# Supplementary material for: Methane Source and Turnover in the Shallow Sediments to the West of Haima Cold Seeps on the Northwestern Slope of the South China Sea
Source: Hindawi journal article supplement (doi:10.1155/2019/1010824), 2019-08-05
Supplement: f1 [file 1010824.f1.docx]

**Supplementary materials**

Model 1: the steady-state model

Model setup

The model solved the following partial differential equations for solid and dissolved species, respectively [47][92]:

(S1)

(S2)

where *x* (cm) is depth, *t* (yr) is time, is porosity, *D*s (cm2 yr-1) is the molecular diffusion coefficient corrected for tortuosity, *C*a (μmol cm-3) is the concentration of dissolved species, *POC* is in wt. %, *v*p (cm yr-1) is the burial velocity of porewater, *v*s (cm yr-1) is the burial velocity of solids, Σ*R* denotes the sum of the rates of biogeochemical reactions considered in the model, and *R*Bui is the mixing rate of bottom water and porewater by bubble irrigation.

Sediment porosity decreases with depth assuming steady-state compaction:

(S3)

where 𝛷𝑓 and 𝛷0 (both dimensionless) denote the porosity below the depth of compaction and at sediment surface, respectively, and *p* (cm-1) is the porosity attenuation coefficient. The fitted profiles of porosity at core CL44 are shown in Figure S1. Since the data of porosity at cores CL30 and CL47 is not available, we applied the mean porosity from the adjacent core CL44 in the model run. As a result, sediment compaction was neglected, and *v*s and *v*p were equivalent to the sedimentation rate (*ω*) which is approximated according to [93] and [94].

Depth-dependent molecular diffusion coefficients of dissolved species were estimated after[47] and [95] and corrected for tortuosity:

(S4)

where *D*mis the molecular diffusion coefficient in free seawater at the in situ temperature, salinity and pressure. The diffusive transport of DIC was simulated using the diffusion coefficient of bicarbonate (HCO3-) because this is the dominant anion.

The major reactions considered in the model are particulate organic matter (POM) degradation via sulfate reduction, methanogenesis, AOM and authigenic Ca- and Mg-carbonate precipitation. The net reaction terms of the one solid (POC) and six dissolved species (SO42-, CH4, DIC, PO43-, Ca2+ and Mg2+) are shown in Table S1. All the model parameters are given in Tables S2&S3.

The length of the simulated cores was set to 1000 cm. Upper boundary conditions for all species were imposed as fixed concentrations (Dirichlet boundary) using measured values in the uppermost sediment layer. A zero concentration gradient (Neumann-type boundary) was imposed at the lower boundary for all species. The model was solved using the NDSolve object of MATHEMATICA V. 10.0. All simulations were run for 107 yr to achieve the steady state with a mass conservation of >99 %.

Model 2: the non-steady-state model

Model setup

This model is also based on governing Eq. (S1) and (S2). Some adjustments were made in the model. The solution of porosity and depth-dependent molecular diffusion coefficient is the same as that in the steady-state model. For the simplicity of computation, we use a reduced model that focuses exclusively on sulfate. The main biogeochemical reactive terms are thus composed of POM decomposition via sulfate reduction, methanogenesis and AOM. The net reaction terms of dissolved species are also listed in Table S1. All the parameters used in the model run are shown in Table S4.

Upper boundary conditions for all species were set as fixed concentrations. Lower boundary conditions were imposed as zero concentration gradient except for methane. A fixed methane concentration which is in equilibrium with the gas hydrate solubility under the conditions of local S, T, P was defined as the lower boundary of methane. The extrapolation of sulfate concentrations in the upper 3.5 m to zero was taken as the initial condition before the increase in methane flux. The partial differential equations were solved by MATHEMATICA V. 10.0.

FIGURE S1: Measured (symbols) and modelled (curves) porosity of core CL44.

**
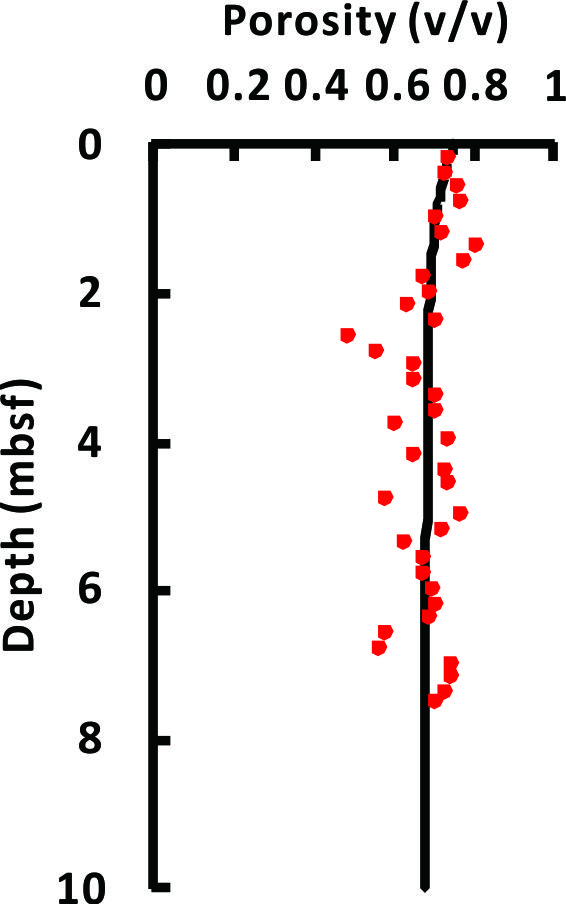
**

FIGURE S2: Grain size parameters of the sediment core CL30 (A), CL44 (B) and CL47 (C). Sand, silt, and clay fractions, average grain size, sorting coefficient with depth and Passega C-M diagram are shown. C = maximum (D99; first percentile) grain size, M = median grain size. Red dots represent the interval (0–360 cm for CL30, 0–200 cm for CL44 and CL47) above the kinks in the porewater profiles.


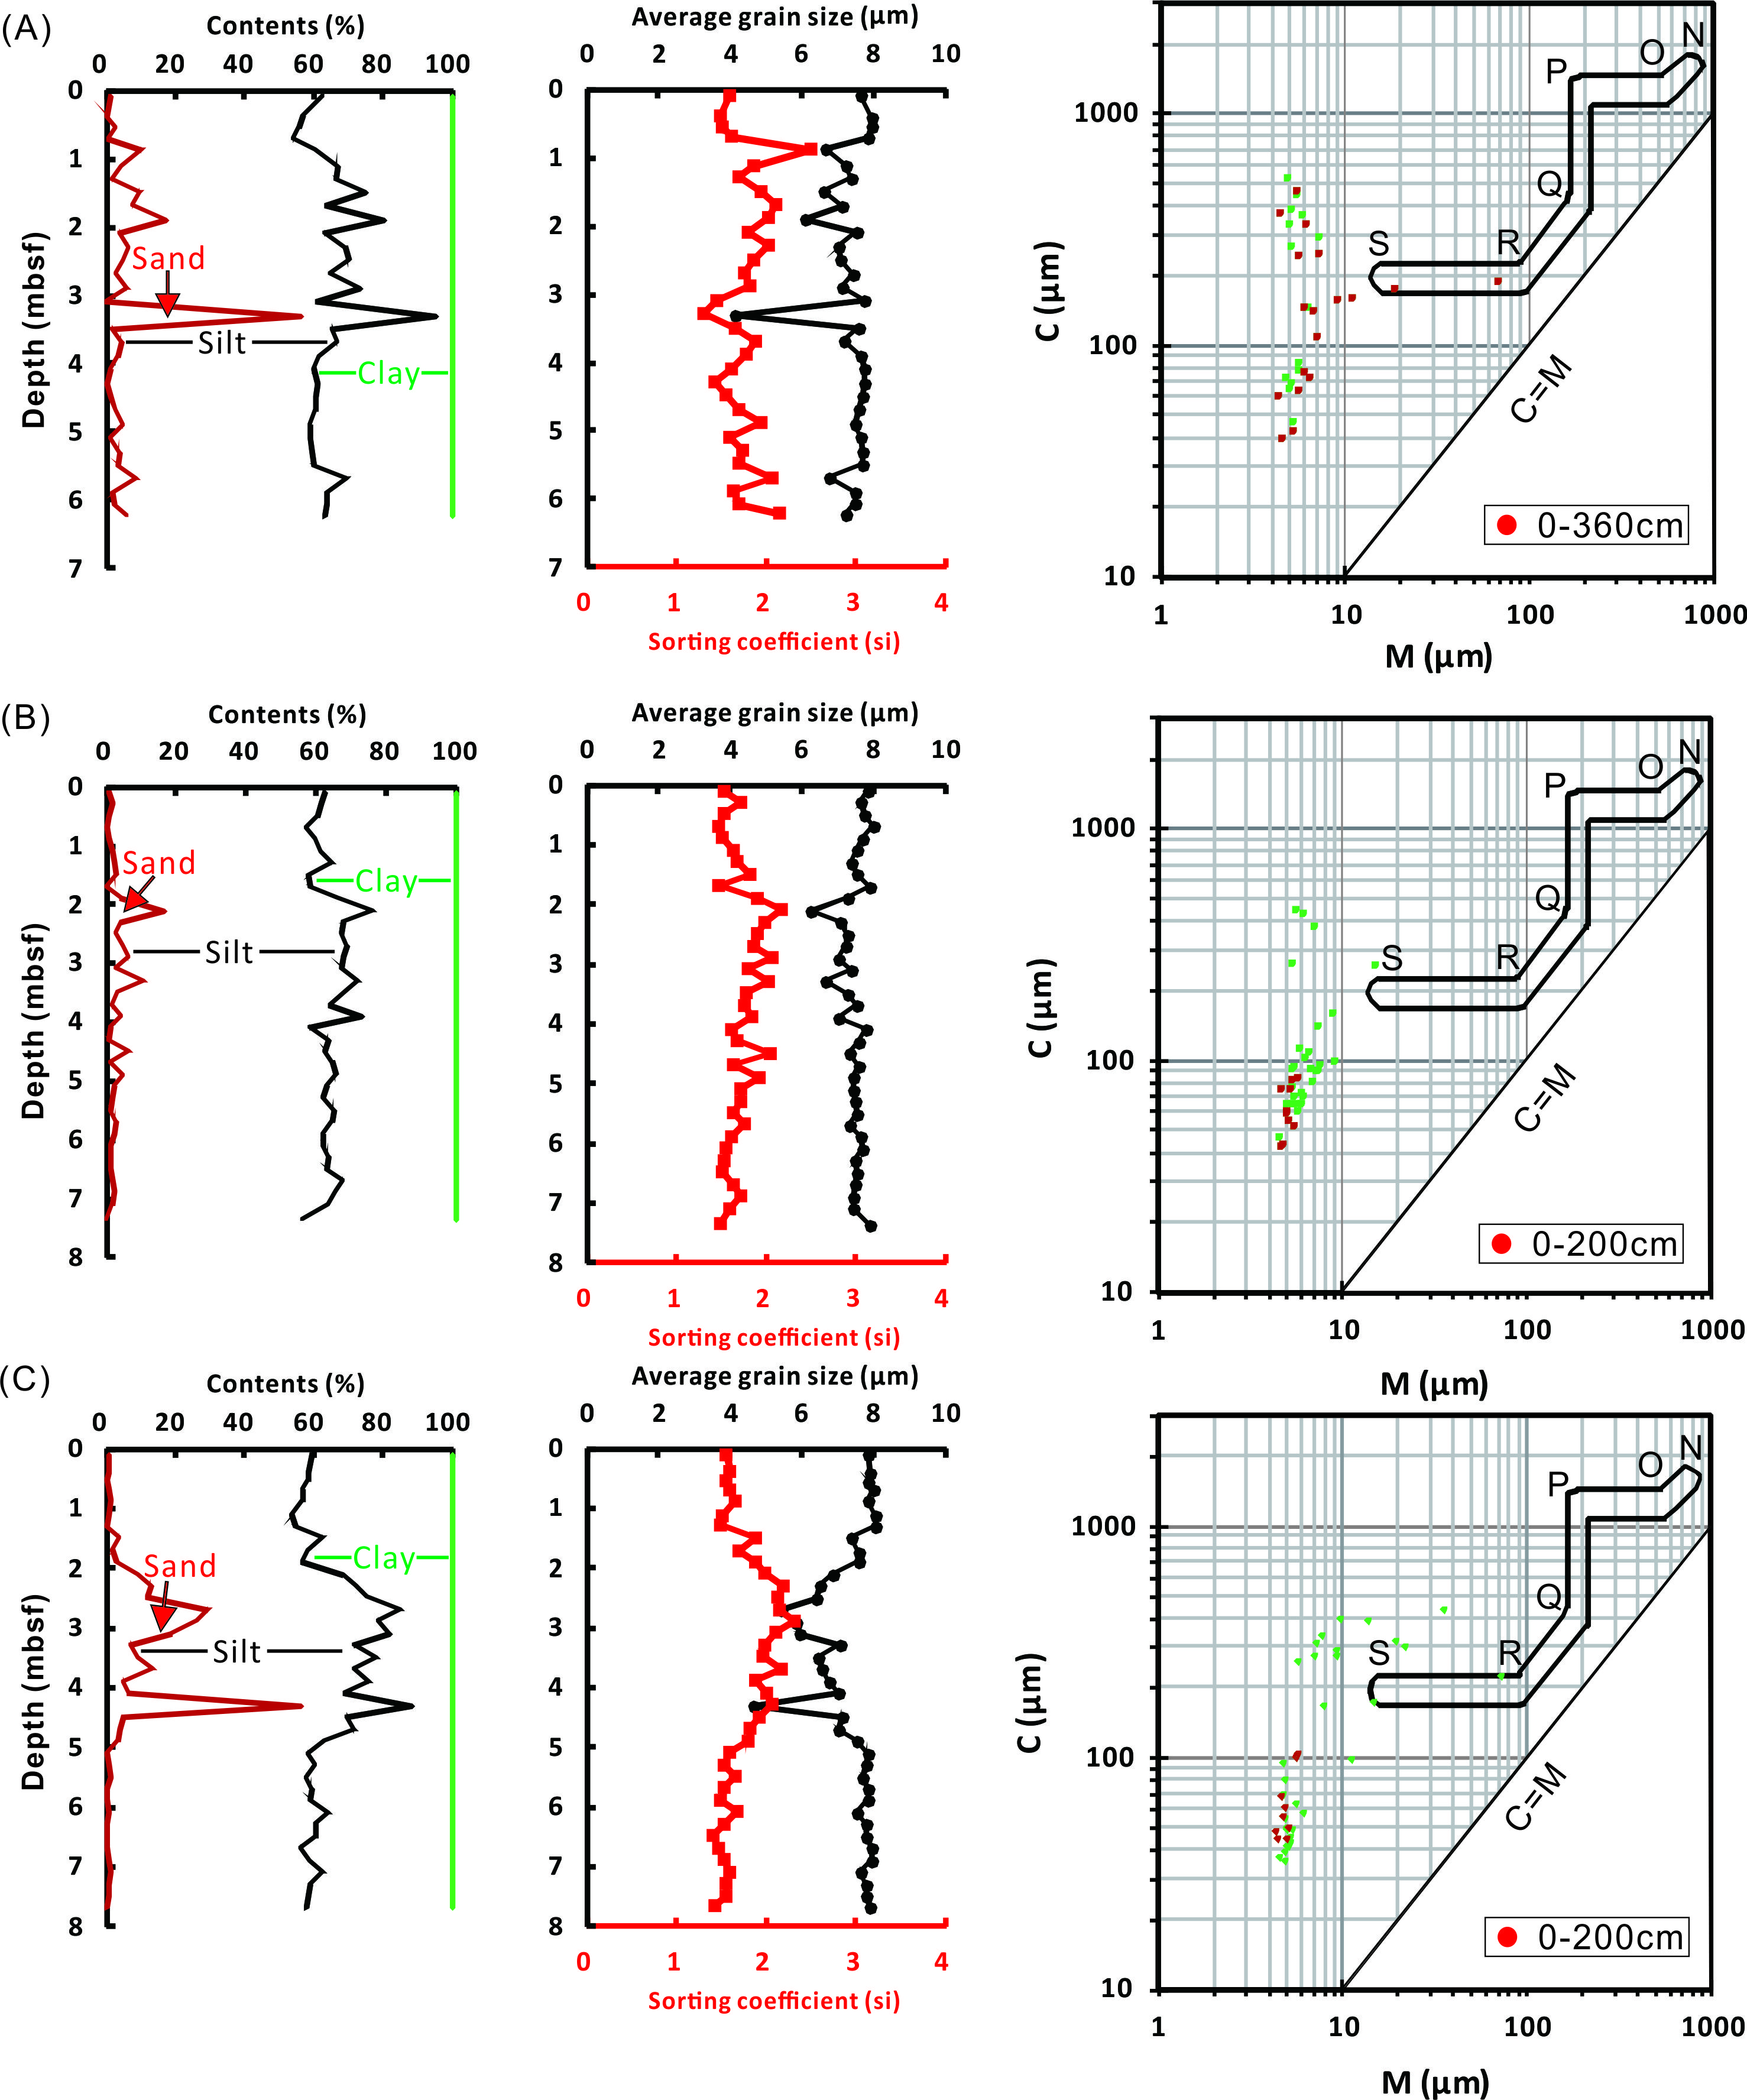


FIGURE S3: Down-core variations in carbonate contents of core CL30 (B), CL44 (C) and CL47 (D). The age model based on sediment carbonate content of a reference core SO49-37KL (A) [70] is used to constrain the marine isotope stages (MIS) of the study cores.


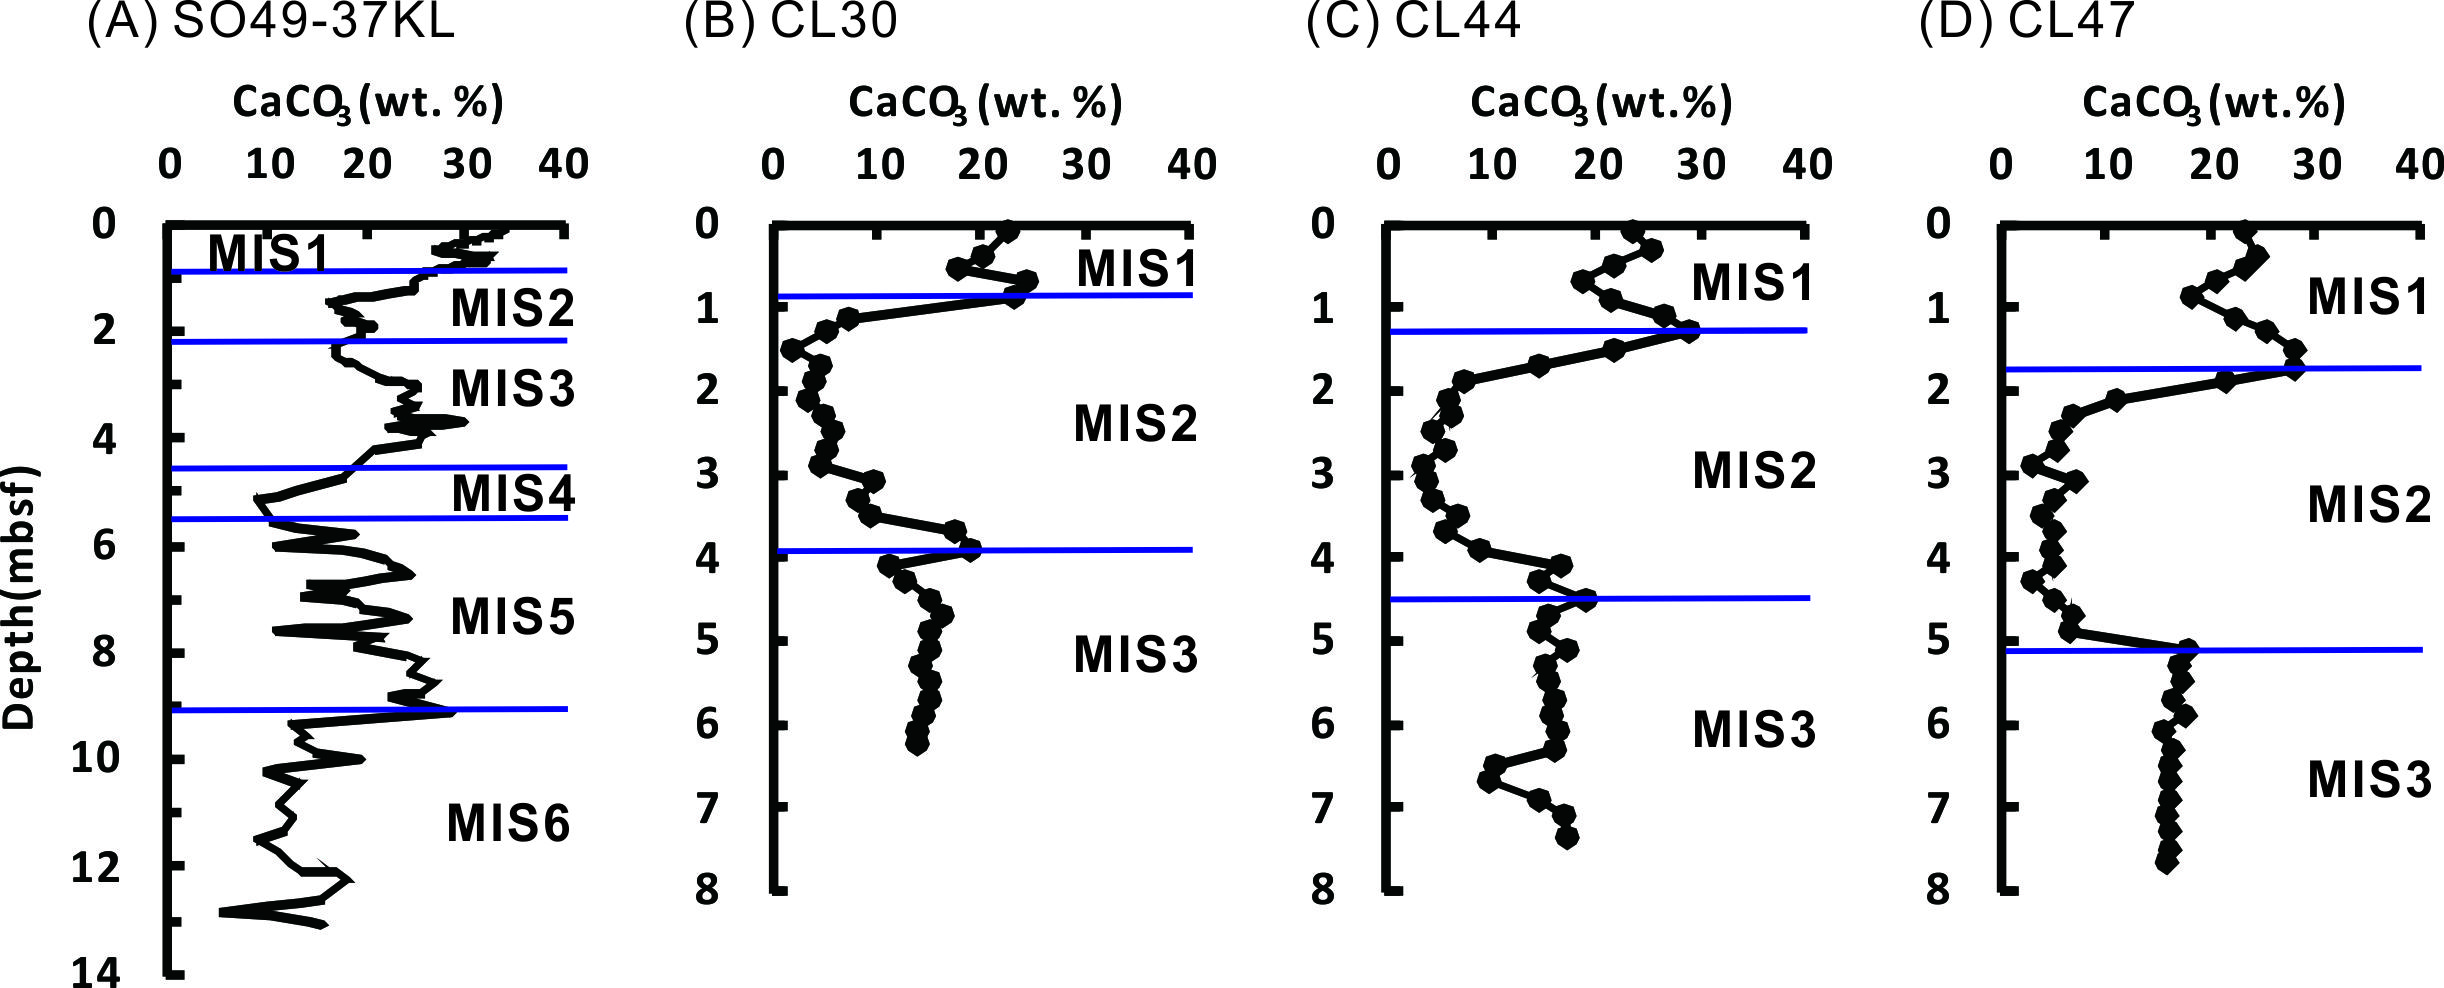


FIGURE S4: Downcore variations in Ti/Al, Si/Al, Zr/Rb and carbonate contents of the sediments core CL30 (A), CL44 (B) and CL47 (C). Marine isotope stages for the study cores were obtained by comparison to the carbonate profile of an adjacent core (see Fig. S3).


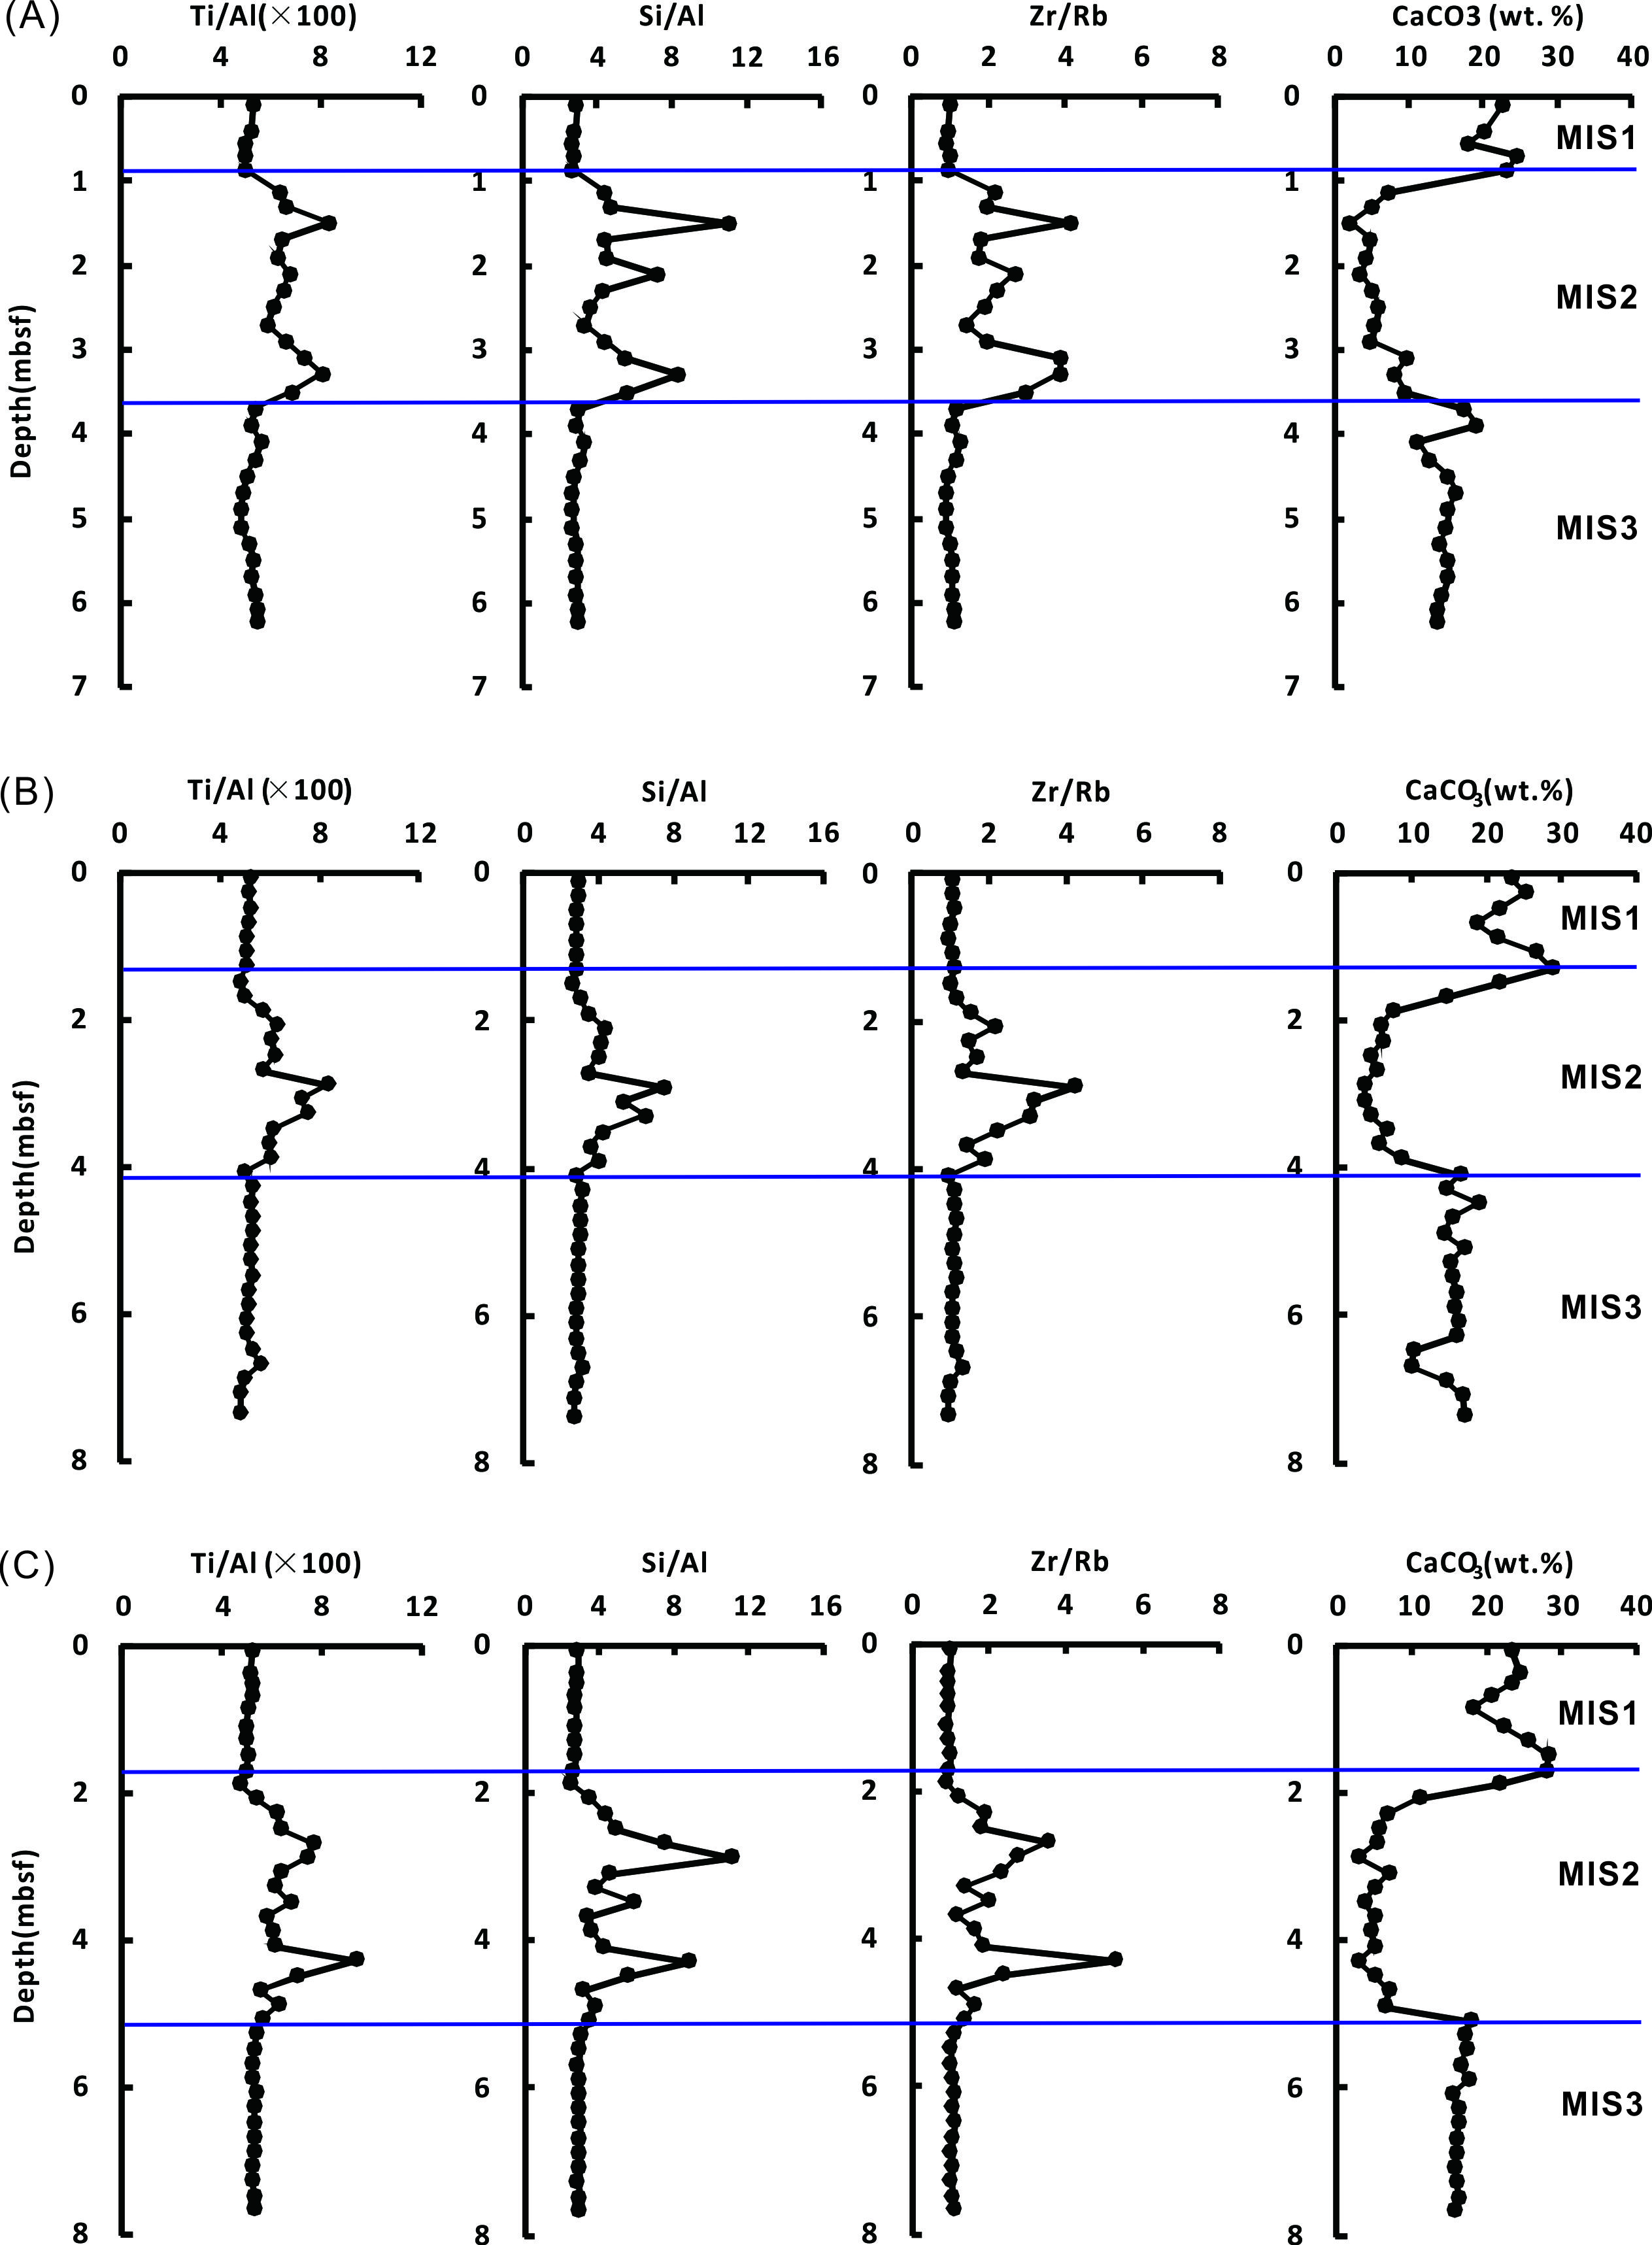


FIGURE S5: Uncertainty evaluation of the formation times of the diagenetic barium enrichments for CL30 (A), CL44 (B) and CL47 (C) considering variable solid phase barium background contents (±5-10% compared to the averaged Ba background, see text) and porosities (0.65-0.75). The horizontal dashed lines indicate the baseline calculation with background Ba of 530, 550 and 590 mg kg-1 and average porosity of 0.69 for each core. Red dots indicate the formation times reported in the text.


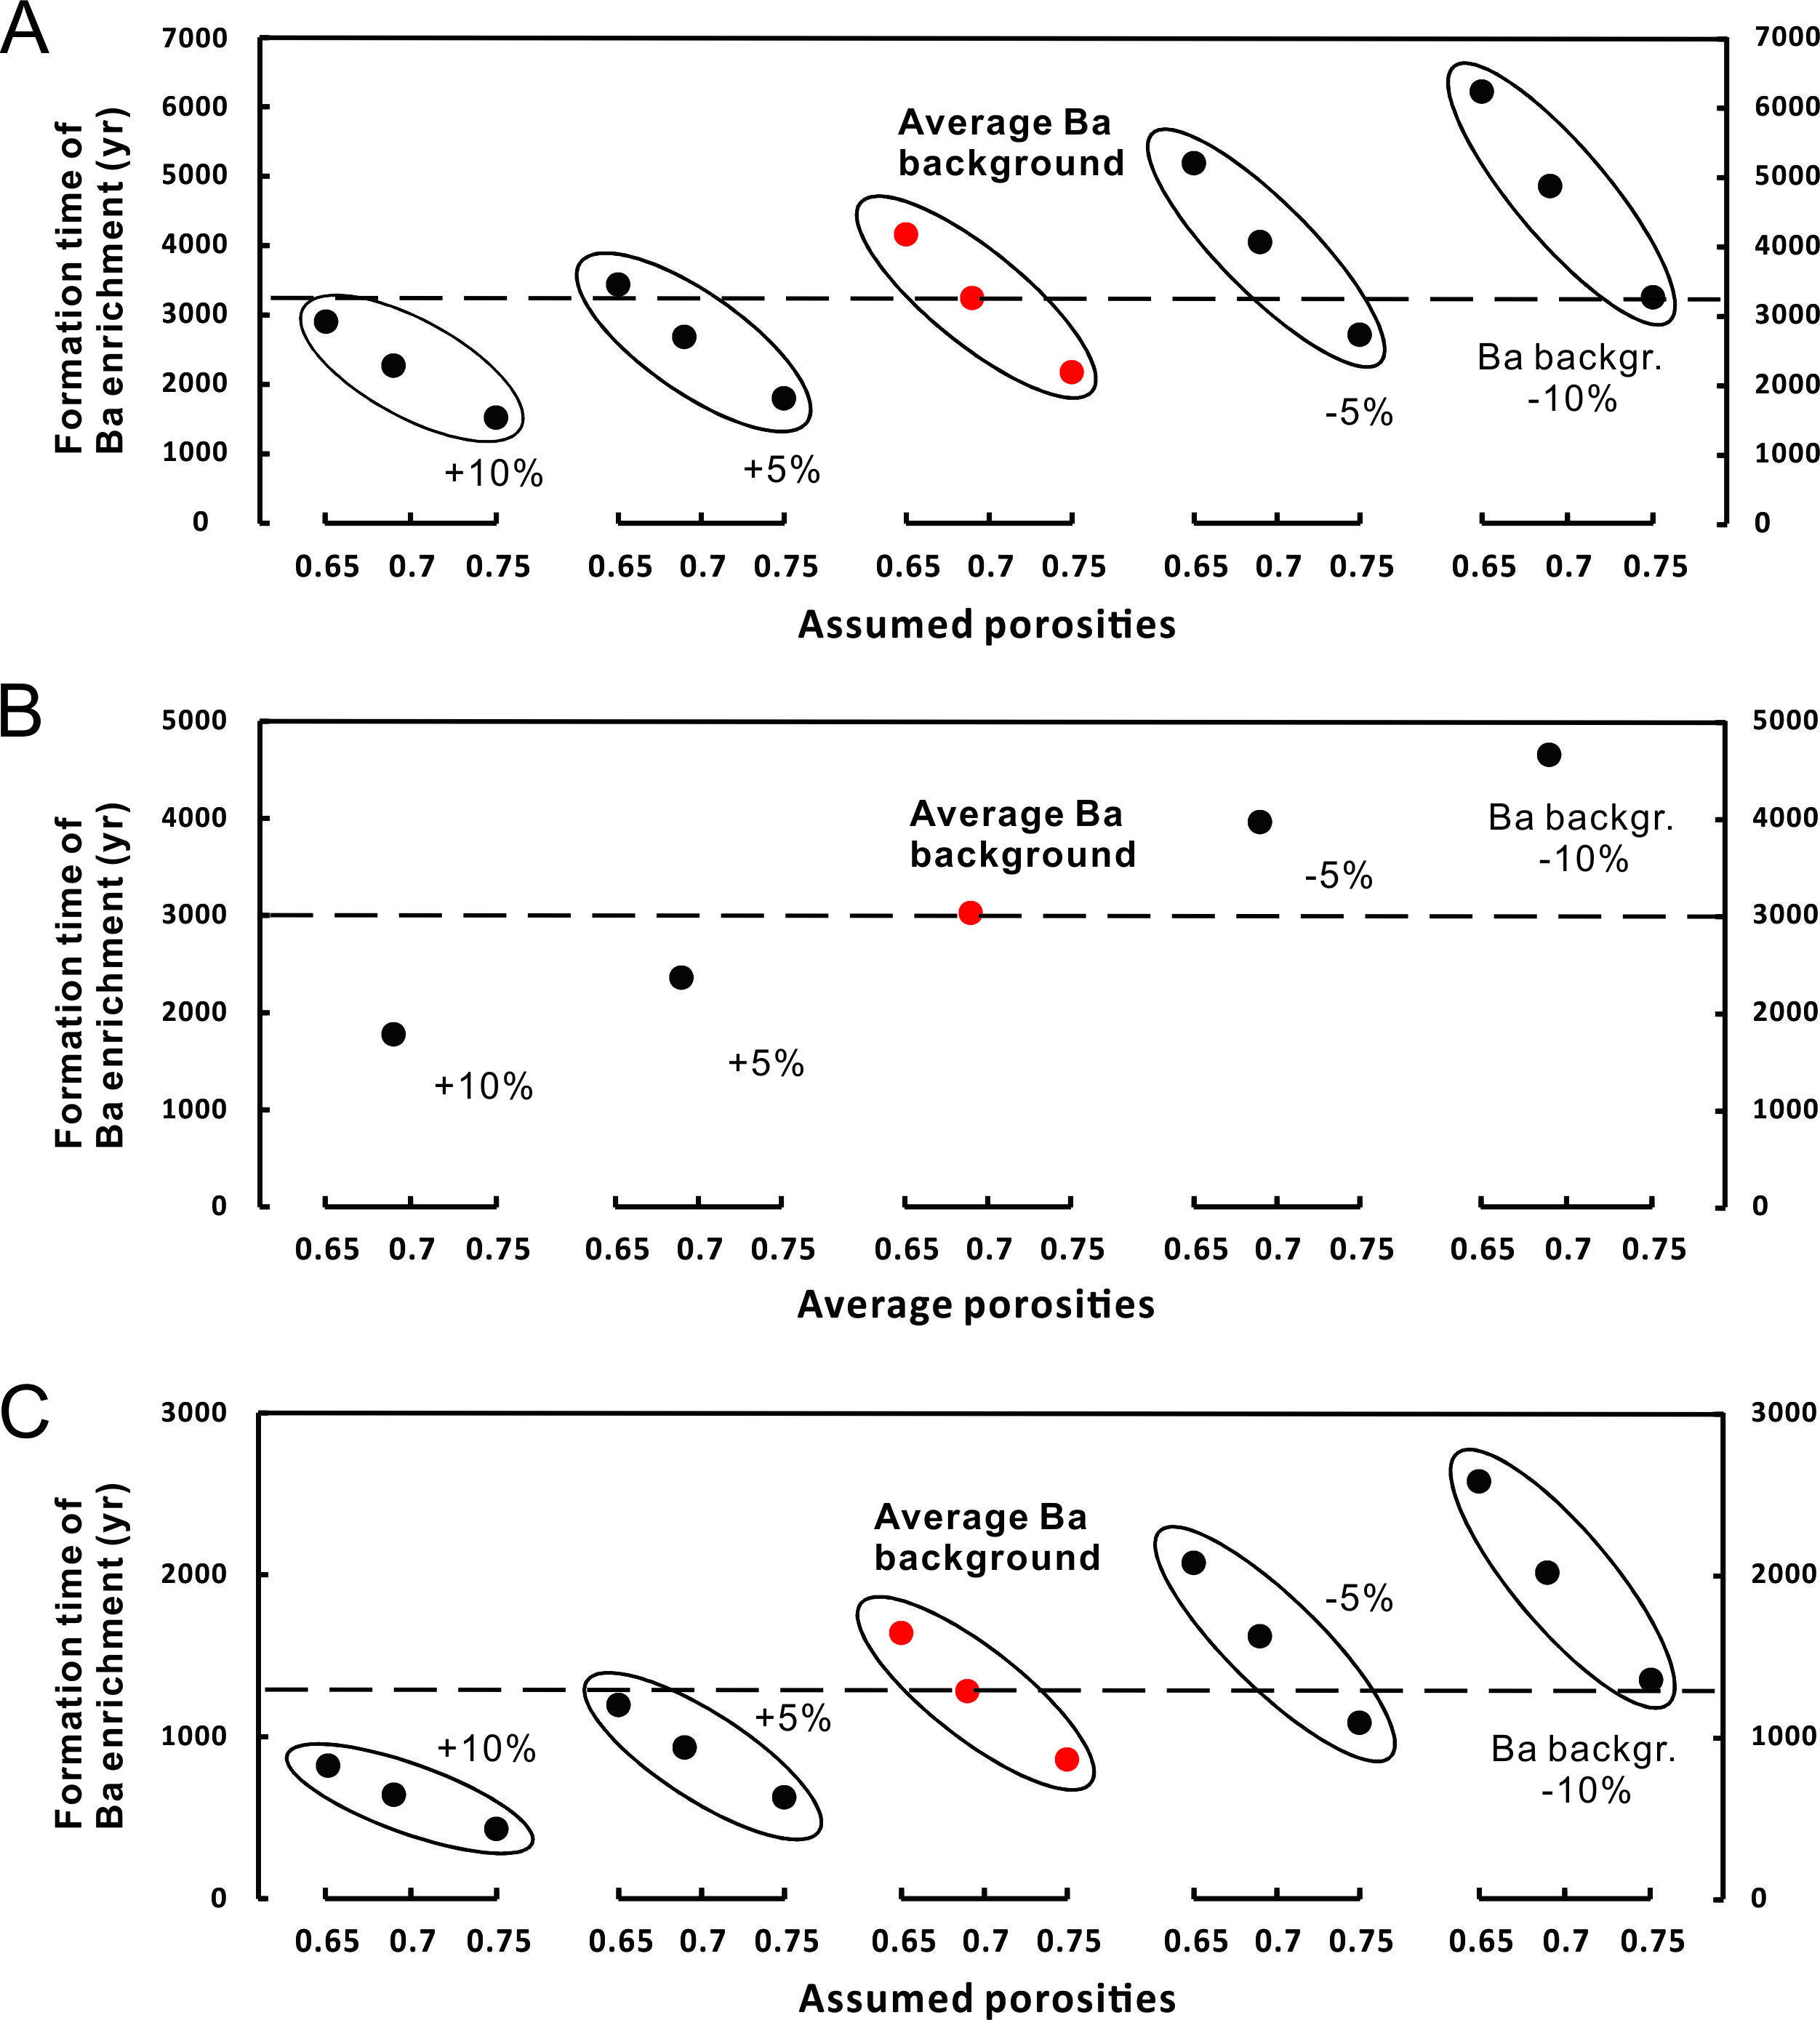


FIGURE S6: Uncertainty evaluation of the formation times of the diagenetic barium enrichments for CL30 (A), CL44 (B) and CL47 (C) considering variable Ba2+ fluxes (-15% compared to the present gradient) and porosities (0.65-0.75). The horizontal dashed lines indicate the baseline calculation with background Ba of 530, 550 and 590 mg kg-1 and average porosity of 0.69 for each core. Red dots indicate the formation times reported in the text.


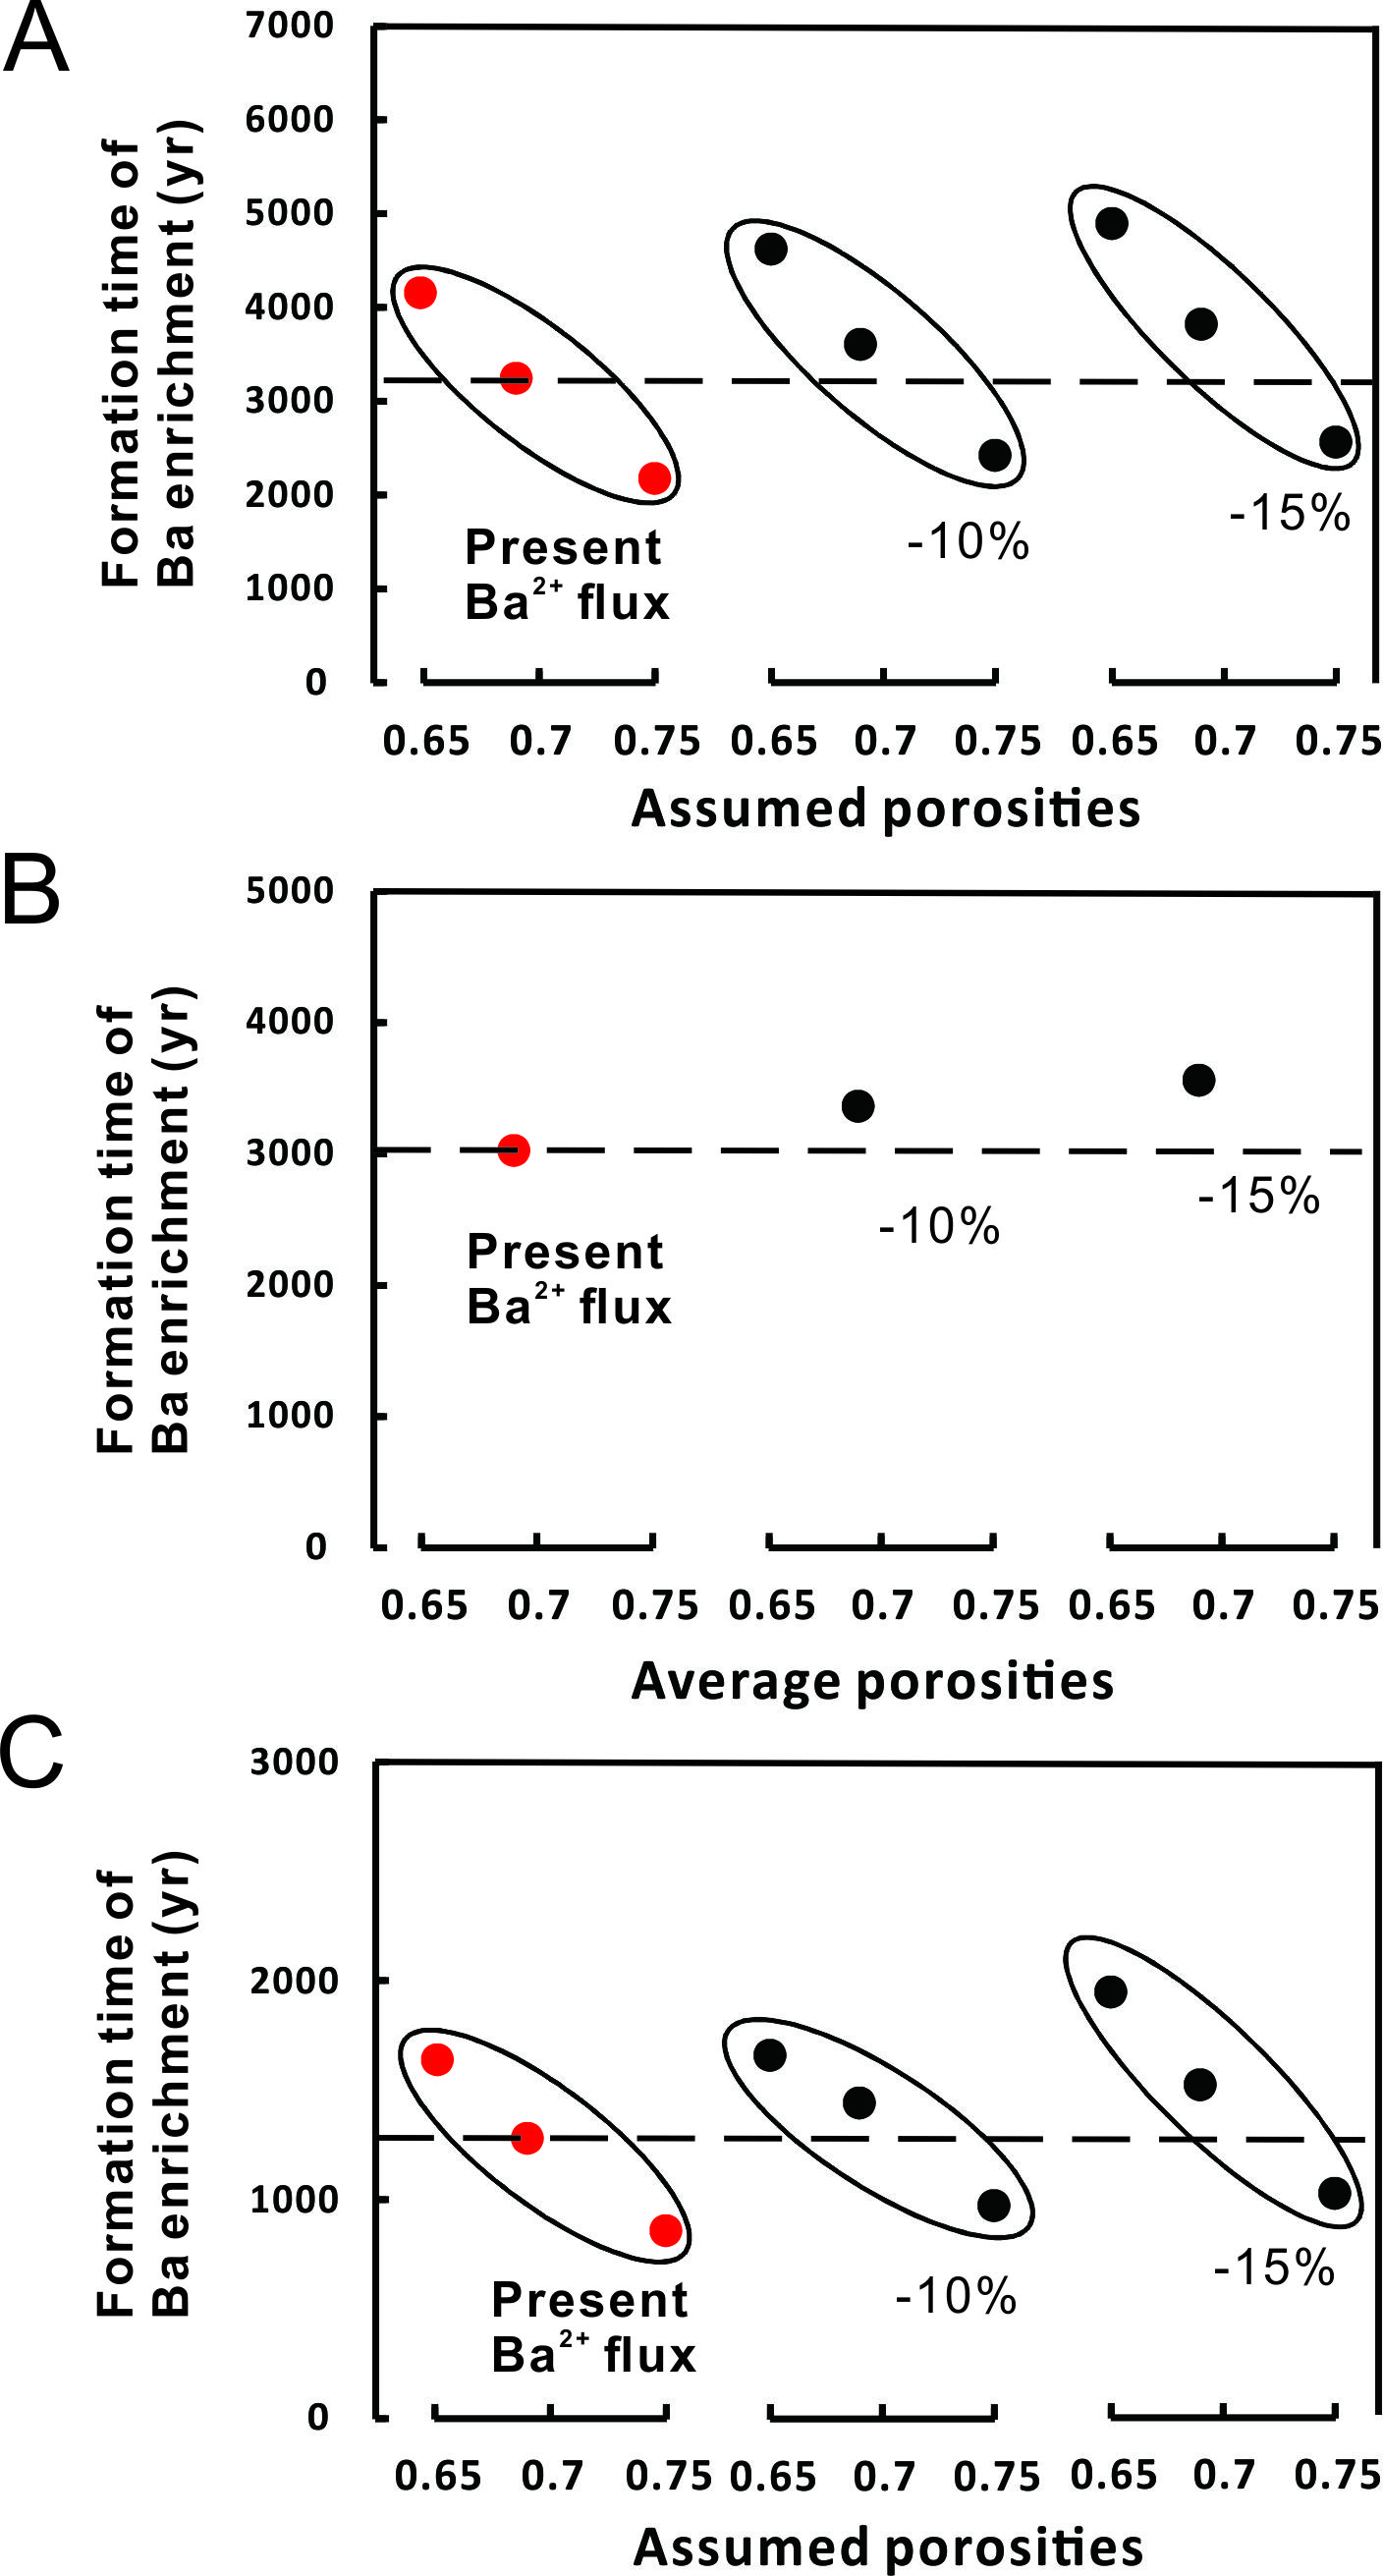


TABLE S1 Reaction terms of all species used in the model.

| Species | Rate |
| --- | --- |
| Particulate organic carbon (POC) | -*R*POC |
| Sulfate (SO42-) | -*R*SR-*R*AOM |
| Methane (CH4) | -*R*AOM+*R*MG+*R*diss |
| Dissolved inorganic carbon (DIC) | *R*POC/*f*POC-*R*MG+*R*AOM-*R*CaCP-*R*MgCP |
| Phosphate (PO43-) | *r*p·*R*POC/*f*POC |
| Calcium (Ca2+) | *-R*CaCP |
| Magnesium (Mg2+) | *-R*MgCP |

TABLE S2 Summary of model parameters and boundary conditions used in the steady-state model.

| Parameter | CL30 | CL44 | CL47 | Unit |
| --- | --- | --- | --- | --- |
| Temperature (*T*)a | 3.3 | 3.2 | 3.1 | oC |
| Salinity (*S*) | 35 | 35 | 35 | PSU |
| Pressure (*P*)b | 12.7 | 12.9 | 13.1 | MPa |
| Density of dry solids (*ρs*) c | 2.58 | 2.58 | 2.58 | g cm-3 |
| Density of porewater (*ρ*pw) | 1.033 | 1.033 | 1.033 | g cm-3 |
| Sedimentation rate (*ω*) d,e | 0.017 | 0.017 | 0.017 | cm yr-1 |
| Michaelis–Menten constant for POC degradation ()f | 1×10-4 | 1×10-4 | 1×10-4 | mM |
| Methane concentration in equilibrium with free gas at in situ S,T,P (LMB) g | 0.125 | 0.125 | 0.125 | mmol cm-3 |
| Methane concentration in equilibrium with gas hydrate at in situ S,T,P (LGH) h | 0.067 | 0.067 | 0.067 | mmol cm-3 |
| Attenuation coefficient for decrease in bubble irrigation (α2)i | 0 | 5 | 5 | cm |

a Estimated according to data of heat flow from different depths, b Calculated from water depth, c According to the average measured value of density of dry solids at core CL44, d [93], e [94], f [47], g [51], h [58], i [48].

TABLE S3Derived and measured (marked with asterisk) parameters used in the steady-state model.

| Parameter | CL30 | CL44 | CL47 |
| --- | --- | --- | --- |
| Porosity at sediment-water interface (Φ*0*)* | 0.69 | 0.75 | 0.69 |
| Porosity in compacted sediments (Φ*f*)* | 0.69 | 0.68 | 0.69 |
| Depth attenuation coefficient for porosity (*p*, cm-1)* | 0 | 0.002 | 0 |
| Initial age of POC (*a*0, kyr) | 53 | 12 | 12 |
| Atomic P/C ratio of organic matter (*r*P, mol P/mol C) | 1/106 | 1/106 | 1/106 |
| Rate constant for AOM (*k*AOM, cm3 yr-1 mmol-1) | 50 | 50 | 50 |
| Rate constant for gas bubble dissolution (*k*MB, yr-1) | - | 8.3×10-5 | 9.6×10-5 |
| Rate constant for gas hydrate formation (*k*GH, yr-1) | - | 0 | 0 |
| Depth of gas bubble irrigation (*L*irr, cm) | - | 220 | 280 |
| Irrigation coefficient at the surface (*α*1, yr-1) | - | 0.1 | 0.1 |
| Rate constant for Ca-carbonate precip./dissol. (*k*Ca, mmol cm-3 yr-1) | 1.9×10-7 | 1.3×10-6 | 3×10-7 |
| Rate constant for Mg-carbonate precip./dissol. (*k*Mg, mmol cm-3 yr-1) | 3×10-8 | 4.8×10-8 | 0 |
| Upper boundary condition for SO42- (mM) | 29.2 | 27.9 | 26 |
| Upper boundary condition for DIC (mM) | 2.8 | 2.2 | 6.0 |
| Upper boundary condition for PO43- (μM) | 0.008 | 0.007 | 0.018 |
| Upper boundary condition for CH4 (mM) | 0 | 0 | 0 |
| Upper boundary condition for Ca2+ (mM) | 11.8 | 7.4 | 10.3 |
| Upper boundary condition for Mg2+ (mM) | 49 | 54 | 40 |
| Lower boundary condition for SO42- |  |  |  |
| Lower boundary condition for DIC |  |  |  |
| Lower boundary condition for PO43- |  |  |  |
| Lower boundary condition for Ca2+ |  |  |  |
| Lower boundary condition for Mg2+ |  |  |  |
| Lower boundary condition for CH4 (mM) | 8.5 |  |  |

TABLE S4Parameters used in the non-steady-state model.

| Parameter | CL30 |
| --- | --- |
| Porosity (*Φ*) | 0.69 |
| Initial age of POC (*a*0, kyr) | 53 |
| Atomic P/C ratio of organic matter (*r*P, mol P/mol C) | 1/106 |
| Rate constant for AOM (*k*AOM, cm3 yr-1 mmol-1) | 50 |
| Upper boundary condition for SO42- (mM) | 29.2 |
| Upper boundary condition for DIC (mM) | 2.8 |
| Upper boundary condition for PO43- (μM) | 0.008 |
| Upper boundary condition for CH4 (mM) | 0 |
| Lower boundary condition for SO42- |  |
| Lower boundary condition for DIC |  |
| Lower boundary condition for PO43- |  |
| Lower boundary condition for CH4 (mM) | 67 |

TABLE S5Porosity and dry grain density of core CL44.

| Depth interval (cm bsf) | Plot depth (cm bsf) | Porosity(v/v) | Dry grain density(g cm-3) |
| --- | --- | --- | --- |
| 16-20 | 20 | 0.74 | 2.67 |
| 36-40 | 40 | 0.73 | 2.37 |
| 56-60 | 60 | 0.76 | 2.63 |
| 76-80 | 80 | 0.77 | 2.57 |
| 96-100 | 100 | 0.71 | 2.13 |
| 116-120 | 120 | 0.72 | 1.93 |
| 136-140 | 140 | 0.81 | 2.85 |
| 156-160 | 160 | 0.78 | 2.54 |
| 176-180 | 180 | 0.68 | 2.69 |
| 196-200 | 200 | 0.69 | 2.61 |
| 216-220 | 220 | 0.64 | 2.47 |
| 236-240 | 240 | 0.71 | 2.42 |
| 256-260 | 260 | 0.49 | 2.28 |
| 276-280 | 280 | 0.56 | 2.45 |
| 296-300 | 300 | 0.65 | 2.36 |
| 316-320 | 320 | 0.65 | 2.32 |
| 336-340 | 340 | 0.71 | 2.6 |
| 356-360 | 360 | 0.71 | 2.43 |
| 376-380 | 380 | 0.61 | 2.42 |
| 396-400 | 400 | 0.74 | 2.71 |
| 416-420 | 420 | 0.65 | 2.8 |
| 436-440 | 440 | 0.73 | 2.85 |
| 456-460 | 460 | 0.74 | 2.82 |
| 476-480 | 480 | 0.58 | 2.46 |
| 496-500 | 500 | 0.77 | 3.04 |
| 516-520 | 520 | 0.72 | 2.79 |
| 536-540 | 540 | 0.63 | 2.81 |
| 556-560 | 560 | 0.68 | 2.44 |
| 576-580 | 580 | 0.68 | 2.35 |
| 596-600 | 600 | 0.7 | 2.75 |
| 616-620 | 620 | 0.71 | 2.93 |
| 636-640 | 640 | 0.69 | 2.72 |
| 656-660 | 660 | 0.58 | 2.87 |
| 676-680 | 680 | 0.57 | 2.65 |
| 696-700 | 700 | 0.75 | 2.74 |
| 716-720 | 720 | 0.75 | 2.84 |
| 736-740 | 740 | 0.73 | 2.54 |
| 748-752 | 752 | 0.71 | 2.31 |

TABLE S6 Solid-phase element contents, Ba/Al, Ti/Al, Si/Al and Zr/Rb ratios as well as POC and CaCO3 contents at cores CL30, CL44 and CL47.

| Sample ID | Depth interval  (cmbsf) | Plot depth  (mbsf) | Si  (wt %) | Al  (wt %) | Ti  (wt %) | Ba  (mg kg-1) | Rb  (mg kg-1) | Zr  (mg kg-1) | Ba/Al  (×103) | Ti/Al  (×102) | Si/Al | Zr/Rb | POC  (wt %) | CaCO3  (wt %) |
| --- | --- | --- | --- | --- | --- | --- | --- | --- | --- | --- | --- | --- | --- | --- |
| CL30-1 | 0-20 | 0.1 | 20.0 | 6.7 | 0.36 | 525 | 114 | 117 | 7.8 | 5.3 | 3.0 | 1.0 | 1.02 | 22.92 |
| CL30-2 | 30-50 | 0.4 | 20.3 | 7.2 | 0.37 | 534 | 122 | 118 | 7.5 | 5.2 | 2.8 | 1.0 | 1.02 | 20.54 |
| CL30-3 | 50-60 | 0.6 | 21.0 | 7.5 | 0.38 | 538 | 130 | 119 | 7.1 | 5.0 | 2.8 | 0.9 | 1.05 | 18.11 |
| CL30-4 | 60-80 | 0.7 | 19.0 | 6.7 | 0.34 | 548 | 114 | 115 | 8.2 | 5.0 | 2.8 | 1.0 | 1.16 | 24.74 |
| CL30-5 | 80-95 | 0.9 | 19.1 | 7.0 | 0.35 | 615 | 117 | 114 | 8.8 | 5.0 | 2.7 | 1.0 | 1.26 | 23.37 |
| CL30-6 | 105-120 | 1.1 | 29.7 | 6.5 | 0.41 | 401 | 114 | 250 | 6.2 | 6.4 | 4.6 | 2.2 | 0.72 | 7.57 |
| CL30-7 | 120-140 | 1.3 | 30.7 | 6.4 | 0.42 | 402 | 109 | 215 | 6.3 | 6.6 | 4.8 | 2.0 | 0.70 | 5.43 |
| CL30-8 | 140-160 | 1.5 | 38.5 | 3.4 | 0.29 | 306 | 71.7 | 299 | 8.9 | 8.4 | 11.2 | 4.2 | 0.09 | 2.35 |
| CL30-9 | 160-180 | 1.7 | 30.2 | 6.7 | 0.43 | 403 | 117 | 212 | 6.0 | 6.5 | 4.5 | 1.8 | 0.87 | 5.00 |
| CL30-10 | 180-200 | 1.9 | 30.7 | 6.6 | 0.42 | 377 | 118 | 209 | 5.7 | 6.3 | 4.6 | 1.8 | 0.83 | 4.41 |
| CL30-11 | 200-220 | 2.1 | 35.0 | 4.8 | 0.32 | 354 | 90.8 | 246 | 7.4 | 6.8 | 7.3 | 2.7 | 0.33 | 3.77 |
| CL30-12 | 220-240 | 2.3 | 29.7 | 6.8 | 0.44 | 399 | 118 | 266 | 5.9 | 6.5 | 4.4 | 2.3 | 0.89 | 5.18 |
| CL30-13 | 240-260 | 2.5 | 27.5 | 7.4 | 0.46 | 408 | 127 | 240 | 5.5 | 6.1 | 3.7 | 1.9 | 1.07 | 6.12 |
| CL30-14 | 260-280 | 2.7 | 27.2 | 7.9 | 0.46 | 421 | 132 | 191 | 5.4 | 5.9 | 3.5 | 1.4 | 1.12 | 5.46 |
| CL30-15 | 280-300 | 2.9 | 30.0 | 6.7 | 0.44 | 386 | 115 | 227 | 5.7 | 6.6 | 4.5 | 2.0 | 0.93 | 4.97 |
| CL30-16 | 300-320 | 3.1 | 29.8 | 5.4 | 0.40 | 378 | 90.1 | 350 | 7.1 | 7.4 | 5.6 | 3.9 | 0.60 | 9.94 |
| CL30-17 | 320-340 | 3.3 | 33.8 | 4.0 | 0.32 | 308 | 75.8 | 296 | 7.7 | 8.1 | 8.4 | 3.9 | 0.31 | 8.39 |
| CL30-18 | 340-360 | 3.5 | 30.3 | 5.3 | 0.37 | 356 | 93.6 | 278 | 6.7 | 6.9 | 5.7 | 3.0 | 0.82 | 9.77 |
| CL30-19 | 360-380 | 3.7 | 22.4 | 7.2 | 0.38 | 537 | 124 | 145 | 7.5 | 5.4 | 3.1 | 1.2 | 1.04 | 17.82 |
| CL30-20 | 380-400 | 3.9 | 21.5 | 7.1 | 0.37 | 530 | 122 | 131 | 7.5 | 5.2 | 3.0 | 1.1 | 1.06 | 19.30 |
| CL30-21 | 400-420 | 4.1 | 25.0 | 7.4 | 0.42 | 594 | 129 | 161 | 8.0 | 5.7 | 3.4 | 1.2 | 0.84 | 11.48 |
| CL30-22 | 420-440 | 4.3 | 24.0 | 7.5 | 0.41 | 957 | 132 | 153 | 12.7 | 5.4 | 3.2 | 1.2 | 1.03 | 13.11 |
| CL30-23 | 440-460 | 4.5 | 22.3 | 7.8 | 0.39 | 421 | 133 | 129 | 5.4 | 5.0 | 2.9 | 1.0 | 1.42 | 15.42 |
| CL30-24 | 460-480 | 4.7 | 21.6 | 7.8 | 0.38 | 418 | 135 | 123 | 5.4 | 4.9 | 2.8 | 0.9 | 1.49 | 16.45 |
| CL30-25 | 480-500 | 4.9 | 21.8 | 7.9 | 0.38 | 436 | 135 | 122 | 5.5 | 4.8 | 2.7 | 0.9 | 1.55 | 15.53 |
| CL30-26 | 500-520 | 5.1 | 21.7 | 8.0 | 0.38 | 434 | 136 | 119 | 5.4 | 4.8 | 2.7 | 0.9 | 1.45 | 15.27 |
| CL30-27 | 520-540 | 5.3 | 22.7 | 7.8 | 0.40 | 453 | 132 | 135 | 5.8 | 5.1 | 2.9 | 1.0 | 1.22 | 14.41 |
| CL30-28 | 540-560 | 5.5 | 22.8 | 7.6 | 0.40 | 454 | 133 | 139 | 6.0 | 5.3 | 3.0 | 1.0 | 1.02 | 15.35 |
| CL30-29 | 560-580 | 5.7 | 22.7 | 7.6 | 0.40 | 456 | 132 | 138 | 6.0 | 5.3 | 3.0 | 1.0 | 1.09 | 15.43 |
| CL30-30 | 580-600 | 5.9 | 23.0 | 7.6 | 0.41 | 457 | 132 | 138 | 6.0 | 5.4 | 3.0 | 1.0 | 1.05 | 14.77 |
| CL30-31 | 600-615 | 6.1 | 23.5 | 7.6 | 0.41 | 462 | 132 | 146 | 6.1 | 5.4 | 3.1 | 1.1 | 0.98 | 14.13 |
| CL30-32 | 615-630 | 6.2 | 23.5 | 7.6 | 0.41 | 474 | 131 | 145 | 6.2 | 5.4 | 3.1 | 1.1 | 1.05 | 14.20 |
| CL44-1 | 0-20 | 0.1 | 19.9 | 6.7 | 0.35 | 529 | 113 | 117 | 7.9 | 5.3 | 3.0 | 1.0 | 0.92 | 23.41 |
| CL44-2 | 20-40 | 0.3 | 19.2 | 6.7 | 0.35 | 545 | 113 | 117 | 8.1 | 5.2 | 2.9 | 1.0 | 0.90 | 25.27 |
| CL44-3 | 40-60 | 0.5 | 20.1 | 7.2 | 0.38 | 518 | 115 | 124 | 7.2 | 5.2 | 2.8 | 1.1 | 0.90 | 21.60 |
| CL44-4 | 60-80 | 0.7 | 20.8 | 7.5 | 0.38 | 545 | 123 | 121 | 7.3 | 5.2 | 2.8 | 1.0 | 0.98 | 18.77 |
| CL44-5 | 80-100 | 0.9 | 19.5 | 7.1 | 0.36 | 574 | 120 | 114 | 8.1 | 5.1 | 2.7 | 1.0 | 1.10 | 21.44 |
| CL44-6 | 100-120 | 1.1 | 18.2 | 6.6 | 0.34 | 568 | 108 | 111 | 8.6 | 5.1 | 2.8 | 1.0 | 1.14 | 26.60 |
| CL44-7 | 120-140 | 1.3 | 18.1 | 6.5 | 0.33 | 620 | 106 | 113 | 9.5 | 5.0 | 2.8 | 1.1 | 1.08 | 28.82 |
| CL44-8 | 140-160 | 1.5 | 19.6 | 7.5 | 0.36 | 574 | 122 | 118 | 7.7 | 4.8 | 2.6 | 1.0 | 1.13 | 21.65 |
| CL44-9 | 160-180 | 1.7 | 22.7 | 7.6 | 0.38 | 537 | 131 | 151 | 7.1 | 5.0 | 3.0 | 1.2 | 1.06 | 14.63 |
| CL44-10 | 180-200 | 1.9 | 26.5 | 7.7 | 0.44 | 473 | 130 | 195 | 6.2 | 5.7 | 3.5 | 1.5 | 0.98 | 7.47 |
| CL44-11 | 200-220 | 2.1 | 29.1 | 6.7 | 0.43 | 415 | 115 | 249 | 6.2 | 6.3 | 4.3 | 2.2 | 0.85 | 5.97 |
| CL44-12 | 220-240 | 2.3 | 28.5 | 6.9 | 0.42 | 423 | 124 | 183 | 6.1 | 6.1 | 4.1 | 1.5 | 1.09 | 6.14 |
| CL44-13 | 240-260 | 2.5 | 29.5 | 7.3 | 0.46 | 410 | 126 | 210 | 5.6 | 6.2 | 4.0 | 1.7 | 0.85 | 4.51 |
| CL44-14 | 260-280 | 2.7 | 27.6 | 8.0 | 0.46 | 422 | 135 | 175 | 5.3 | 5.7 | 3.4 | 1.3 | 1.05 | 5.46 |
| CL44-15 | 280-300 | 2.9 | 34.9 | 4.7 | 0.39 | 332 | 86.9 | 368 | 7.1 | 8.3 | 7.4 | 4.2 | 0.40 | 3.57 |
| CL44-16 | 300-320 | 3.1 | 32.1 | 6.1 | 0.44 | 391 | 106 | 333 | 6.4 | 7.3 | 5.3 | 3.1 | 0.68 | 3.67 |
| CL44-17 | 320-340 | 3.3 | 33.8 | 5.2 | 0.39 | 356 | 95.4 | 294 | 6.9 | 7.5 | 6.5 | 3.1 | 0.50 | 4.41 |
| CL44-18 | 340-360 | 3.5 | 28.6 | 6.9 | 0.43 | 429 | 118 | 258 | 6.2 | 6.2 | 4.2 | 2.2 | 0.93 | 6.68 |
| CL44-19 | 360-380 | 3.7 | 27.5 | 7.6 | 0.46 | 450 | 133 | 189 | 5.9 | 6.0 | 3.6 | 1.4 | 1.06 | 5.66 |
| CL44-20 | 380-400 | 3.9 | 27.8 | 7.0 | 0.43 | 432 | 119 | 226 | 6.1 | 6.1 | 4.0 | 1.9 | 0.86 | 8.75 |
| CL44-21 | 400-420 | 4.1 | 21.6 | 7.7 | 0.38 | 538 | 131 | 123 | 7.0 | 5.0 | 2.8 | 0.9 | 1.04 | 16.63 |
| CL44-22 | 420-440 | 4.3 | 23.8 | 7.6 | 0.40 | 505 | 131 | 146 | 6.7 | 5.3 | 3.1 | 1.1 | 0.89 | 14.59 |
| CL44-23 | 440-460 | 4.5 | 21.7 | 7.1 | 0.37 | 549 | 122 | 133 | 7.7 | 5.2 | 3.0 | 1.1 | 1.04 | 19.10 |
| CL44-24 | 460-480 | 4.7 | 22.9 | 7.5 | 0.40 | 505 | 129 | 146 | 6.7 | 5.4 | 3.0 | 1.1 | 0.98 | 15.53 |
| CL44-25 | 480-500 | 4.9 | 23.3 | 7.6 | 0.41 | 513 | 130 | 139 | 6.7 | 5.3 | 3.0 | 1.1 | 0.96 | 14.43 |
| CL44-26 | 500-520 | 5.1 | 22.0 | 7.6 | 0.40 | 551 | 129 | 135 | 7.3 | 5.2 | 2.9 | 1.0 | 1.06 | 17.20 |
| CL44-27 | 520-540 | 5.3 | 22.5 | 7.8 | 0.41 | 524 | 132 | 143 | 6.7 | 5.3 | 2.9 | 1.1 | 1.04 | 15.05 |
| CL44-28 | 540-560 | 5.5 | 22.5 | 7.8 | 0.41 | 616 | 128 | 146 | 7.9 | 5.3 | 2.9 | 1.1 | 1.01 | 15.53 |
| CL44-29 | 560-580 | 5.7 | 22.4 | 7.7 | 0.40 | 730 | 129 | 136 | 9.5 | 5.1 | 2.9 | 1.1 | 1.17 | 15.91 |
| CL44-30 | 580-600 | 5.9 | 22.2 | 7.8 | 0.40 | 741 | 130 | 136 | 9.5 | 5.2 | 2.8 | 1.0 | 1.24 | 15.83 |
| CL44-31 | 600-620 | 6.1 | 22.3 | 7.8 | 0.40 | 486 | 130 | 134 | 6.2 | 5.0 | 2.8 | 1.0 | 1.29 | 16.32 |
| CL44-32 | 620-640 | 6.3 | 22.3 | 7.9 | 0.40 | 432 | 128 | 133 | 5.5 | 5.1 | 2.8 | 1.0 | 1.31 | 15.96 |
| CL44-33 | 640-660 | 6.5 | 24.7 | 8.4 | 0.44 | 463 | 141 | 158 | 5.5 | 5.3 | 3.0 | 1.1 | 1.40 | 10.29 |
| CL44-34 | 660-680 | 6.7 | 25.0 | 8.1 | 0.46 | 448 | 131 | 169 | 5.5 | 5.6 | 3.1 | 1.3 | 1.96 | 9.87 |
| CL44-35 | 680-700 | 6.9 | 22.5 | 7.9 | 0.40 | 478 | 135 | 135 | 6.0 | 5.0 | 2.8 | 1.0 | 1.35 | 14.69 |
| CL44-36 | 700-720 | 7.1 | 21.3 | 7.9 | 0.38 | 471 | 133 | 122 | 6.0 | 4.8 | 2.7 | 0.9 | 1.29 | 16.90 |
| CL44-37 | 720-752 | 7.4 | 21.3 | 8.0 | 0.38 | 484 | 132 | 123 | 6.1 | 4.8 | 2.7 | 0.9 | 1.33 | 17.11 |
| CL47-1 | 0-20 | 0.1 | 19.9 | 6.8 | 0.35 | 589 | 115 | 120 | 8.6 | 5.2 | 2.9 | 1.0 | 0.96 | 23.26 |
| CL47-2 | 30-50 | 0.4 | 19.4 | 6.8 | 0.35 | 567 | 115 | 114 | 8.3 | 5.1 | 2.8 | 1.0 | 0.90 | 24.38 |
| CL47-3 | 50-60 | 0.6 | 19.7 | 6.9 | 0.36 | 545 | 117 | 116 | 7.9 | 5.2 | 2.8 | 1.0 | 0.88 | 23.38 |
| CL47-4 | 60-80 | 0.7 | 20.3 | 7.2 | 0.37 | 563 | 123 | 119 | 7.8 | 5.2 | 2.8 | 1.0 | 0.91 | 20.75 |
| CL47-5 | 80-95 | 0.9 | 20.8 | 7.6 | 0.38 | 578 | 127 | 122 | 7.6 | 5.1 | 2.7 | 1.0 | 0.96 | 18.11 |
| CL47-6 | 105-120 | 1.1 | 19.6 | 7.2 | 0.35 | 581 | 120 | 112 | 8.1 | 4.9 | 2.7 | 0.9 | 1.04 | 22.39 |
| CL47-7 | 120-140 | 1.3 | 18.6 | 6.8 | 0.34 | 611 | 112 | 111 | 9.0 | 5.0 | 2.7 | 1.0 | 1.09 | 25.50 |
| CL47-8 | 140-160 | 1.5 | 17.7 | 6.3 | 0.32 | 632 | 106 | 111 | 10.0 | 5.0 | 2.8 | 1.0 | 1.16 | 28.20 |
| CL47-9 | 165-180 | 1.7 | 17.9 | 6.6 | 0.32 | 674 | 110 | 108 | 10.3 | 4.9 | 2.7 | 1.0 | 1.26 | 27.97 |
| CL47-10 | 180-200 | 1.9 | 19.2 | 7.6 | 0.35 | 610 | 125 | 114 | 8.1 | 4.7 | 2.5 | 0.9 | 1.18 | 21.60 |
| CL47-11 | 200-220 | 2.1 | 25.7 | 7.2 | 0.38 | 490 | 126 | 155 | 6.8 | 5.3 | 3.6 | 1.2 | 1.02 | 11.17 |
| CL47-12 | 220-240 | 2.3 | 29.3 | 6.6 | 0.41 | 445 | 116 | 222 | 6.7 | 6.2 | 4.4 | 1.9 | 0.80 | 6.78 |
| CL47-13 | 240-260 | 2.5 | 30.5 | 6.2 | 0.40 | 394 | 107 | 195 | 6.4 | 6.4 | 4.9 | 1.8 | 1.19 | 5.53 |
| CL47-14 | 260-280 | 2.7 | 34.5 | 4.5 | 0.35 | 350 | 90.7 | 324 | 7.7 | 7.7 | 7.6 | 3.6 | 0.39 | 5.25 |
| CL47-15 | 280-300 | 2.9 | 38.2 | 3.4 | 0.25 | 349 | 79.0 | 217 | 10.3 | 7.4 | 11.2 | 2.7 | 0.00 | 3.02 |
| CL47-16 | 300-320 | 3.1 | 29.4 | 6.3 | 0.40 | 431 | 114 | 267 | 6.8 | 6.4 | 4.7 | 2.3 | 1.48 | 7.09 |
| CL47-17 | 320-340 | 3.3 | 28.2 | 7.4 | 0.45 | 411 | 124 | 172 | 5.6 | 6.1 | 3.8 | 1.4 | 1.29 | 5.02 |
| CL47-18 | 340-360 | 3.5 | 33.2 | 5.6 | 0.38 | 389 | 104 | 211 | 7.0 | 6.8 | 6.0 | 2.0 | 0.72 | 3.84 |
| CL47-19 | 360-380 | 3.7 | 27.3 | 7.8 | 0.46 | 449 | 138 | 166 | 5.7 | 5.8 | 3.5 | 1.2 | 1.29 | 5.07 |
| CL47-20 | 380-400 | 3.9 | 28.2 | 7.7 | 0.46 | 425 | 137 | 230 | 5.5 | 6.0 | 3.7 | 1.7 | 1.19 | 4.64 |
| CL47-21 | 400-420 | 4.1 | 29.6 | 6.9 | 0.42 | 429 | 120 | 222 | 6.2 | 6.1 | 4.3 | 1.9 | 0.98 | 5.02 |
| CL47-22 | 420-440 | 4.3 | 36.2 | 4.1 | 0.38 | 349 | 78.5 | 417 | 8.6 | 9.4 | 8.9 | 5.3 | 0.36 | 2.92 |
| CL47-23 | 440-460 | 4.5 | 31.9 | 5.6 | 0.40 | 367 | 104 | 252 | 6.5 | 7.0 | 5.7 | 2.4 | 0.89 | 5.10 |
| CL47-24 | 460-480 | 4.7 | 25.8 | 8.0 | 0.44 | 479 | 137 | 165 | 6.0 | 5.6 | 3.2 | 1.2 | 1.21 | 6.96 |
| CL47-25 | 480-500 | 4.9 | 28.0 | 7.3 | 0.46 | 422 | 124 | 207 | 5.8 | 6.3 | 3.9 | 1.7 | 1.40 | 6.44 |
| CL47-26 | 500-520 | 5.1 | 23.6 | 6.6 | 0.37 | 522 | 118 | 166 | 7.9 | 5.6 | 3.6 | 1.4 | 1.02 | 17.80 |
| CL47-27 | 520-540 | 5.3 | 22.9 | 7.4 | 0.40 | 520 | 125 | 139 | 7.1 | 5.4 | 3.1 | 1.1 | 1.04 | 17.16 |
| CL47-28 | 540-560 | 5.5 | 22.3 | 7.5 | 0.40 | 555 | 128 | 130 | 7.4 | 5.3 | 3.0 | 1.0 | 1.06 | 17.44 |
| CL47-29 | 560-580 | 5.7 | 22.4 | 7.7 | 0.40 | 561 | 129 | 135 | 7.3 | 5.2 | 2.9 | 1.0 | 1.08 | 16.46 |
| CL47-30 | 580-600 | 5.9 | 22.1 | 7.5 | 0.39 | 584 | 127 | 137 | 7.8 | 5.2 | 3.0 | 1.1 | 1.08 | 17.72 |
| CL47-31 | 600-620 | 6.1 | 22.6 | 7.5 | 0.40 | 591 | 129 | 143 | 7.8 | 5.3 | 3.0 | 1.1 | 1.06 | 15.43 |
| CL47-32 | 620-640 | 6.3 | 22.4 | 7.5 | 0.40 | 790 | 128 | 137 | 10.6 | 5.3 | 3.0 | 1.1 | 1.06 | 16.34 |
| CL47-33 | 640-660 | 6.5 | 22.5 | 7.6 | 0.40 | 474 | 128 | 146 | 6.3 | 5.3 | 3.0 | 1.1 | 1.36 | 16.22 |
| CL47-34 | 660-680 | 6.7 | 22.5 | 7.6 | 0.40 | 478 | 127 | 134 | 6.3 | 5.3 | 3.0 | 1.1 | 1.19 | 16.04 |
| CL47-35 | 680-700 | 6.9 | 22.4 | 7.5 | 0.40 | 472 | 130 | 136 | 6.3 | 5.3 | 3.0 | 1.0 | 1.20 | 16.07 |
| CL47-36 | 700-720 | 7.1 | 22.5 | 7.6 | 0.40 | 489 | 132 | 139 | 6.5 | 5.2 | 3.0 | 1.1 | 1.27 | 15.83 |
| CL47-37 | 720-740 | 7.3 | 22.3 | 7.6 | 0.40 | 467 | 132 | 136 | 6.1 | 5.2 | 2.9 | 1.0 | 1.22 | 16.04 |
| CL47-38 | 740-760 | 7.5 | 22.4 | 7.6 | 0.40 | 482 | 131 | 143 | 6.3 | 5.3 | 2.9 | 1.1 | 1.26 | 16.22 |
| CL47-39 | 760-775 | 7.7 | 22.7 | 7.7 | 0.41 | 482 | 132 | 147 | 6.3 | 5.3 | 3.0 | 1.1 | 1.26 | 15.72 |

TABLE S7 Grain size parameters of cores CL30, CL44 and CL47.

| Sample  ID | Depth interval (cmbsf) | Plot depth (mbsf) | Grain-size composition (%) | | | Mz  (μm) | Md  (μm) | sorting coefficient (σi) | D (99)  (μm) |
| --- | --- | --- | --- | --- | --- | --- | --- | --- | --- |
| sand | silt | clay |
| CL30-1 | 0-20 | 0.1 | 1.0 | 62.0 | 37.0 | 7.7 | 5.8 | 1.6 | 62.7 |
| CL30-2 | 30-50 | 0.4 | 0.4 | 56.3 | 43.3 | 8.0 | 4.7 | 1.51 | 39.1 |
| CL30-3 | 50-60 | 0.6 | 2.9 | 52.8 | 44.3 | 8.0 | 4.5 | 1.52 | 362.9 |
| CL30-4 | 60-80 | 0.7 | 0.9 | 53.1 | 46.0 | 7.9 | 4.4 | 1.62 | 59.8 |
| CL30-5 | 80-95 | 0.9 | 10.2 | 50.6 | 39.2 | 6.7 | 5.6 | 2.52 | 457.3 |
| CL30-6 | 105-120 | 1.1 | 4.7 | 62.6 | 32.8 | 7.2 | 6.8 | 1.87 | 138.1 |
| CL30-7 | 120-140 | 1.3 | 1.5 | 64.9 | 33.6 | 7.4 | 6.5 | 1.71 | 71.6 |
| CL30-8 | 140-160 | 1.5 | 10.0 | 65.3 | 24.7 | 6.6 | 11.2 | 1.96 | 157.1 |
| CL30-9 | 160-180 | 1.7 | 7.5 | 56.4 | 36.1 | 7.1 | 6.3 | 2.12 | 326.2 |
| CL30-10 | 180-200 | 1.9 | 17.1 | 63.3 | 19.7 | 6.1 | 19.0 | 2.04 | 172.4 |
| CL30-11 | 200-220 | 2.1 | 3.9 | 59.2 | 36.9 | 7.5 | 5.7 | 1.82 | 241.3 |
| CL30-12 | 220-240 | 2.3 | 6.8 | 62.5 | 30.7 | 7.0 | 7.4 | 2.03 | 245.9 |
| CL30-13 | 240-260 | 2.5 | 5.0 | 65.1 | 30.0 | 7.1 | 7.3 | 1.87 | 107.6 |
| CL30-14 | 260-280 | 2.7 | 2.6 | 62.2 | 35.2 | 7.5 | 6.1 | 1.77 | 144.3 |
| CL30-15 | 280-300 | 2.9 | 5.8 | 67.4 | 26.8 | 7.1 | 9.2 | 1.84 | 155.8 |
| CL30-16 | 300-320 | 3.1 | 0.2 | 61.1 | 38.7 | 7.8 | 5.3 | 1.47 | 41.6 |
| CL30-17 | 320-340 | 3.3 | 56.4 | 38.8 | 4.8 | 4.2 | 69.9 | 1.32 | 186.5 |
| CL30-18 | 340-360 | 3.5 | 1.6 | 63.9 | 34.6 | 7.6 | 6.1 | 1.67 | 76.1 |
| CL30-19 | 360-380 | 3.7 | 4.3 | 62.9 | 32.9 | 7.2 | 6.5 | 1.89 | 144.6 |
| CL30-20 | 380-400 | 3.9 | 3.6 | 58.3 | 38.1 | 7.7 | 5.6 | 1.8 | 436.3 |
| CL30-21 | 400-420 | 4.1 | 1.1 | 59.2 | 39.7 | 7.8 | 5.2 | 1.63 | 67.7 |
| CL30-22 | 420-440 | 4.3 | 0.4 | 60.9 | 38.7 | 7.8 | 5.3 | 1.43 | 45.9 |
| CL30-23 | 440-460 | 4.5 | 1.0 | 59.6 | 39.4 | 7.7 | 5.1 | 1.57 | 63.7 |
| CL30-24 | 460-480 | 4.7 | 2.7 | 57.7 | 39.6 | 7.6 | 5.2 | 1.71 | 265.3 |
| CL30-25 | 480-500 | 4.9 | 5.2 | 53.7 | 41.2 | 7.5 | 5.1 | 1.95 | 328.5 |
| CL30-26 | 500-520 | 5.1 | 1.3 | 57.9 | 40.8 | 7.7 | 4.9 | 1.61 | 71.0 |
| CL30-27 | 520-540 | 5.3 | 4.1 | 55.4 | 40.5 | 7.7 | 5.0 | 1.74 | 521.1 |
| CL30-28 | 540-560 | 5.5 | 3.2 | 56.9 | 39.9 | 7.7 | 5.2 | 1.71 | 378.9 |
| CL30-29 | 560-580 | 5.7 | 8.6 | 61.4 | 30.1 | 6.8 | 7.4 | 2.08 | 287.7 |
| CL30-30 | 580-600 | 5.9 | 1.7 | 62.3 | 36.0 | 7.5 | 5.7 | 1.65 | 76.6 |
| CL30-31 | 600-615 | 6.1 | 2.1 | 61.6 | 36.4 | 7.5 | 5.7 | 1.7 | 82.5 |
| CL30-32 | 615-630 | 6.2 | 5.8 | 57.8 | 36.4 | 7.2 | 6.0 | 2.16 | 358.3 |
| CL44-1 | 0-20 | 0.1 | 0.7 | 62.0 | 37.3 | 7.8 | 5.6 | 1.55 | 51.5 |
| CL44-2 | 20-40 | 0.3 | 1.8 | 59.6 | 38.6 | 7.6 | 5.4 | 1.72 | 80.5 |
| CL44-3 | 40-60 | 0.5 | 0.7 | 59.8 | 39.5 | 7.7 | 5.2 | 1.54 | 54.3 |
| CL44-4 | 60-80 | 0.7 | 0.4 | 56.9 | 42.7 | 8.0 | 4.8 | 1.48 | 41.9 |
| CL44-5 | 80-100 | 0.9 | 0.8 | 59.1 | 40.2 | 7.7 | 5.1 | 1.52 | 57.9 |
| CL44-6 | 100-120 | 1.1 | 1.5 | 60.3 | 38.2 | 7.6 | 5.3 | 1.64 | 74.0 |
| CL44-7 | 120-140 | 1.3 | 2.2 | 62.8 | 35.0 | 7.4 | 5.9 | 1.69 | 82.6 |
| CL44-8 | 140-160 | 1.5 | 2.6 | 55.2 | 42.1 | 7.6 | 4.8 | 1.83 | 74.3 |
| CL44-9 | 160-180 | 1.7 | 0.0 | 58.2 | 41.8 | 7.9 | 4.8 | 1.49 | 42.7 |
| CL44-10 | 180-200 | 1.9 | 4.5 | 61.8 | 33.7 | 7.3 | 6.8 | 1.92 | 107.3 |
| CL44-11 | 200-220 | 2.1 | 16.3 | 60.3 | 23.4 | 6.3 | 15.5 | 2.19 | 255.9 |
| CL44-12 | 220-240 | 2.3 | 4.5 | 63.6 | 32.0 | 7.1 | 7.8 | 1.99 | 94.3 |
| CL44-13 | 240-260 | 2.5 | 2.9 | 64.3 | 32.8 | 7.3 | 7.4 | 1.92 | 88.4 |
| CL44-14 | 260-280 | 2.7 | 5.1 | 64.0 | 30.9 | 7.3 | 7.6 | 1.88 | 138.6 |
| CL44-15 | 280-300 | 2.9 | 6.8 | 61.4 | 31.9 | 7.0 | 7.3 | 2.07 | 373.1 |
| CL44-16 | 300-320 | 3.1 | 3.1 | 64.5 | 32.5 | 7.4 | 6.9 | 1.81 | 90.0 |
| CL44-17 | 320-340 | 3.3 | 10.7 | 61.5 | 27.8 | 6.7 | 9.1 | 2.04 | 157.7 |
| CL44-18 | 340-360 | 3.5 | 3.1 | 65.6 | 31.4 | 7.3 | 7.5 | 1.79 | 88.3 |
| CL44-19 | 360-380 | 3.7 | 1.5 | 62.7 | 35.7 | 7.5 | 6.1 | 1.77 | 71.1 |
| CL44-20 | 380-400 | 3.9 | 4.3 | 68.7 | 27.0 | 7.0 | 9.4 | 1.86 | 97.0 |
| CL44-21 | 400-420 | 4.1 | 1.0 | 57.6 | 41.4 | 7.8 | 5.0 | 1.62 | 63.5 |
| CL44-22 | 420-440 | 4.3 | 0.8 | 62.7 | 36.5 | 7.6 | 5.9 | 1.68 | 59.2 |
| CL44-23 | 440-460 | 4.5 | 6.5 | 56.1 | 37.4 | 7.3 | 5.7 | 2.05 | 439.1 |
| CL44-24 | 460-480 | 4.7 | 1.3 | 63.6 | 35.1 | 7.6 | 6.2 | 1.65 | 69.3 |
| CL44-25 | 480-500 | 4.9 | 5.0 | 60.5 | 34.4 | 7.5 | 6.2 | 1.93 | 424.9 |
| CL44-26 | 500-520 | 5.1 | 2.1 | 61.0 | 36.9 | 7.5 | 5.6 | 1.73 | 93.2 |
| CL44-27 | 520-540 | 5.3 | 2.0 | 60.3 | 37.7 | 7.5 | 5.5 | 1.72 | 90.1 |
| CL44-28 | 540-560 | 5.5 | 1.1 | 64.2 | 34.8 | 7.6 | 6.1 | 1.64 | 64.3 |
| CL44-29 | 560-580 | 5.7 | 3.1 | 61.6 | 35.4 | 7.4 | 5.9 | 1.78 | 110.3 |
| CL44-30 | 580-600 | 5.9 | 2.4 | 59.8 | 37.8 | 7.6 | 5.4 | 1.63 | 259.9 |
| CL44-31 | 600-620 | 6.1 | 1.0 | 61.1 | 37.9 | 7.7 | 5.5 | 1.57 | 63.7 |
| CL44-32 | 620-640 | 6.3 | 1.3 | 62.3 | 36.4 | 7.5 | 5.6 | 1.55 | 69.2 |
| CL44-33 | 640-660 | 6.5 | 1.1 | 62.2 | 36.7 | 7.6 | 5.7 | 1.52 | 64.3 |
| CL44-34 | 660-680 | 6.7 | 1.8 | 66.4 | 31.8 | 7.5 | 7.0 | 1.64 | 79.8 |
| CL44-35 | 680-700 | 6.9 | 2.1 | 63.9 | 34.0 | 7.4 | 6.4 | 1.72 | 100.5 |
| CL44-36 | 700-720 | 7.1 | 1.6 | 61.9 | 36.4 | 7.4 | 5.4 | 1.6 | 76.0 |
| CL44-37 | 720-752 | 7.4 | 0.3 | 55.7 | 44.0 | 7.9 | 4.6 | 1.51 | 45.9 |
| CL47-1 | 0-20 | 0.1 | 0.5 | 59.2 | 40.2 | 7.9 | 5.2 | 1.57 | 49.8 |
| CL47-2 | 30-50 | 0.4 | 0.9 | 57.4 | 41.7 | 7.9 | 5.0 | 1.61 | 60.7 |
| CL47-3 | 50-60 | 0.6 | 0.3 | 58.3 | 41.4 | 7.9 | 5.1 | 1.56 | 44.7 |
| CL47-4 | 60-80 | 0.7 | 0.8 | 56.1 | 43.1 | 8.0 | 4.8 | 1.6 | 55.8 |
| CL47-5 | 80-95 | 0.9 | 1.2 | 55.6 | 43.2 | 7.9 | 4.7 | 1.66 | 67.9 |
| CL47-6 | 105-120 | 1.1 | 0.5 | 53.1 | 46.5 | 8.1 | 4.4 | 1.52 | 48.0 |
| CL47-7 | 120-140 | 1.3 | 0.3 | 54.2 | 45.5 | 8.0 | 4.5 | 1.5 | 44.9 |
| CL47-8 | 140-160 | 1.5 | 3.7 | 58.9 | 37.4 | 7.4 | 5.7 | 1.89 | 100.3 |
| CL47-9 | 165-180 | 1.7 | 1.8 | 56.8 | 41.5 | 7.6 | 4.9 | 1.71 | 80.5 |
| CL47-10 | 180-200 | 1.9 | 2.9 | 53.9 | 43.2 | 7.6 | 4.8 | 1.89 | 95.7 |
| CL47-11 | 200-220 | 2.1 | 9.4 | 59.3 | 31.3 | 6.9 | 7.2 | 1.99 | 277.4 |
| CL47-12 | 220-240 | 2.3 | 13.2 | 59.1 | 27.7 | 6.5 | 9.9 | 2.2 | 397.5 |
| CL47-13 | 240-260 | 2.5 | 12.0 | 63.6 | 24.4 | 6.4 | 14.1 | 2.14 | 387.3 |
| CL47-14 | 260-280 | 2.7 | 29.4 | 55.9 | 14.8 | 5.4 | 35.8 | 2.17 | 435.7 |
| CL47-15 | 280-300 | 2.9 | 26.2 | 52.8 | 21.0 | 5.9 | 19.7 | 2.32 | 321.7 |
| CL47-16 | 300-320 | 3.1 | 18.8 | 63.0 | 18.2 | 5.9 | 22.3 | 2.12 | 300.6 |
| CL47-17 | 320-340 | 3.3 | 7.0 | 64.8 | 28.2 | 7.1 | 9.5 | 2 | 291.5 |
| CL47-18 | 340-360 | 3.5 | 9.4 | 69.1 | 21.5 | 6.4 | 14.9 | 1.98 | 173.2 |
| CL47-19 | 360-380 | 3.7 | 13.3 | 58.4 | 28.2 | 6.6 | 9.4 | 2.19 | 275.8 |
| CL47-20 | 380-400 | 3.9 | 5.1 | 70.8 | 24.1 | 6.8 | 11.4 | 1.9 | 98.9 |
| CL47-21 | 400-420 | 4.1 | 6.8 | 62.5 | 30.6 | 7.1 | 7.9 | 2.02 | 338.4 |
| CL47-22 | 420-440 | 4.3 | 56.4 | 32.0 | 11.7 | 4.6 | 73.8 | 2.08 | 223.4 |
| CL47-23 | 440-460 | 4.5 | 5.1 | 64.4 | 30.4 | 7.2 | 7.3 | 1.93 | 311.7 |
| CL47-24 | 460-480 | 4.7 | 4.1 | 67.9 | 28.0 | 7.0 | 8.0 | 1.83 | 168.9 |
| CL47-25 | 480-500 | 4.9 | 3.3 | 60.2 | 36.5 | 7.5 | 5.8 | 1.82 | 258.4 |
| CL47-26 | 500-520 | 5.1 | 0.1 | 58.2 | 41.8 | 7.9 | 5.0 | 1.6 | 39.7 |
| CL47-27 | 520-540 | 5.3 | 0.5 | 60.2 | 39.3 | 7.8 | 5.4 | 1.55 | 49.5 |
| CL47-28 | 540-560 | 5.5 | 1.3 | 56.7 | 42.0 | 7.7 | 4.9 | 1.67 | 69.4 |
| CL47-29 | 560-580 | 5.7 | 0.1 | 59.4 | 40.5 | 7.8 | 5.2 | 1.54 | 41.9 |
| CL47-30 | 580-600 | 5.9 | 0.2 | 58.7 | 41.1 | 7.9 | 5.1 | 1.5 | 41.5 |
| CL47-31 | 600-620 | 6.1 | 0.7 | 63.7 | 35.6 | 7.6 | 6.2 | 1.69 | 58.1 |
| CL47-32 | 620-640 | 6.3 | 0.3 | 60.3 | 39.5 | 7.8 | 5.4 | 1.54 | 45.5 |
| CL47-33 | 640-660 | 6.5 | 0.3 | 60.6 | 39.1 | 7.8 | 5.3 | 1.41 | 43.5 |
| CL47-34 | 660-680 | 6.7 | 0.2 | 55.9 | 43.9 | 8.0 | 4.6 | 1.48 | 37.4 |
| CL47-35 | 680-700 | 6.9 | 0.6 | 58.4 | 41.1 | 8.0 | 5.0 | 1.54 | 48.6 |
| CL47-36 | 700-720 | 7.1 | 1.0 | 61.7 | 37.3 | 7.6 | 5.7 | 1.6 | 63.4 |
| CL47-37 | 720-740 | 7.3 | 0.5 | 58.3 | 41.2 | 7.8 | 5.0 | 1.56 | 50.2 |
| CL47-38 | 740-760 | 7.5 | 0.7 | 58.0 | 41.4 | 7.8 | 5.0 | 1.56 | 54.4 |
| CL47-39 | 760-775 | 7.7 | 0.1 | 58.1 | 41.9 | 7.9 | 4.9 | 1.43 | 35.9 |

References

1. R. A. Berner, “Early Diagenesis: A Theoretical Approach,” *Princeton University Press*, Princeton, pp. 241, 1980.
2. C. Y. Huang, S. F. Wu, M. Zhao, M. T. Chen, C. H. Wang, X. Tu, and P. B. Yuan, “Surface ocean and monsoon climate variability in the South China Sea since the last glaciation,” *Marine Micropaleontology*, vol. 32, pp. 71-94, 1997.
3. P. Wang, W. Prell, and P. Blum, “Proceeding of the Ocean Drilling Program: Initial Reports 184,” Texas A&M University, College Station, TX, USA, 2000.
4. E. H. Oelkers and C. H. Harold, "Calculation of activity coefficients and degrees of formation of neutral ion pairs in supercritical electrolyte solutions," *Geochimica et Cosmochimica Acta*, vol. 55, pp. 1235-1251, 1991.
